1 p53 drives premature neuronal differentiation in response to  
2 radiation-induced DNA damage during early neurogenesis

3

4 André-Claude Mbouombouo Mfossa<sup>1,2,#</sup>, Mieke Verslegers<sup>1,#</sup>, Tine Verreet<sup>1,3,§</sup>, Haris bin Fida<sup>1</sup>,  
5 Mohamed Mysara<sup>1</sup>, Wilfred F.J. Van IJcken<sup>4,5</sup>, Winnok H. De Vos<sup>6</sup>, Lieve Moons<sup>3</sup>, Sarah Baatout<sup>1</sup>,  
6 Mohammed A. Benotmane<sup>1</sup>, Danny Huylebroeck<sup>2,4,5</sup>, Roel Quintens<sup>1,#,\*</sup>

7

8 <sup>1</sup> Radiobiology Unit, Institute of Environment, Health and Safety, SCK•CEN, Mol, Belgium

9 <sup>2</sup> Laboratory of Molecular Biology (Celgen), Department Development and Regeneration, KU Leuven,  
10 Leuven, Belgium

11 <sup>3</sup> Laboratory of Neural Circuit Development and Regeneration, Department of Biology, Faculty of  
12 Science, KU Leuven, Leuven, Belgium

13 <sup>4</sup> Center for Biomics, Erasmus University Medical Center, Rotterdam, The Netherlands

14 <sup>5</sup> Department of Cell Biology, Erasmus University Medical Center, Rotterdam, The Netherlands

15 <sup>6</sup> Laboratory of Cell Biology and Histology, Department of Veterinary Sciences, University of Antwerp,  
16 Antwerp, Belgium

17

18 # Equal contribution

19 \* Correspondence: [roel.quintens@sckcen.be](mailto:roel.quintens@sckcen.be)

20 <sup>§</sup> Current address: Neural Wiring Laboratory, Center for Brain & Disease Research, VIB Leuven,  
21 Leuven, Belgium and Department of Neurosciences, KU Leuven, Leuven, Belgium

22

23 **Abstract**

24 p53 regulates the cellular DNA damage response (DDR). Hyperactivation of p53 during embryonic  
25 development, however, can lead to a range of developmental defects including microcephaly. Here,  
26 we induce microcephaly by acute irradiation of mouse fetuses at the onset of neurogenesis. Besides  
27 a classical DDR culminating in massive apoptosis, we observe ectopic neurons in the subventricular  
28 zone in the brains of irradiated mice, indicative of premature neuronal differentiation. A  
29 transcriptomic study indicates that p53 activates both DDR genes and differentiation-associated  
30 genes. In line with this, mice with a targeted inactivation of *Trp53* in the dorsal forebrain, do not  
31 show this ectopic phenotype and partially restore brain size after irradiation. Irradiation furthermore  
32 induces an epithelial-to-mesenchymal transition-like process resembling the radiation-induced  
33 proneural-mesenchymal transition in glioma and glioma stem-like cells. Our results demonstrate a  
34 critical role for p53 beyond the DDR as a regulator of neural progenitor cell fate in response to DNA  
35 damage.

36 Keywords: p53, microcephaly, DNA damage, radiation, premature neuronal differentiation, EMT,  
37 PMT

38

## 39 Introduction

40 The classical function of *TP53* (*Trp53* in mice) is that of a central player in the cellular response to  
41 stresses such as DNA damage through transcriptional activation of genes driving cell cycle arrest,  
42 DNA repair, senescence and apoptosis<sup>1</sup>. The exact outcome depends on the type and persistence of  
43 the induced damage and the level of p53 activation<sup>2</sup>. Collectively, this safeguards genomic stability  
44 and prevents cells from becoming malignant, a role for which p53 earned the nickname “guardian of  
45 the genome”<sup>3</sup>. In recent years, additional functions of p53 and its direct target genes emerged,  
46 including in autophagy, metabolism, epithelial-to-mesenchymal transition (EMT), pluripotency and  
47 differentiation, each of which can be either positively or negatively regulated by p53<sup>4</sup>. For this  
48 reason, p53 is now additionally considered a “guardian of cellular homeostasis”<sup>4</sup>.

49 The many biological functions and cellular processes regulated by p53 are also reflected by  
50 developmental syndromes that result from inappropriate p53 hyperactivation during embryogenesis,  
51 triggering apoptosis or restraining proliferation of certain cell types<sup>5</sup>. For other p53-controlled  
52 processes, like EMT and cellular differentiation, the etiology of these syndromes is currently  
53 unknown<sup>5,6</sup>. Many of these so-called p53-associated syndromes have been modeled in mice via  
54 introduction of mutations that affect various cellular processes converging on p53 activation. When  
55 this occurs in the brain during neurogenesis the resulting phenotypes mostly encompass  
56 microcephaly as a consequence of neuronal apoptosis<sup>5</sup>, which can be rescued, at least partially, by  
57 knocking out *Trp53*<sup>7-14</sup>. Microcephaly can also be caused by environmental factors like Zika virus  
58 (ZIKV) infection<sup>15</sup> or exposure to moderate and high doses of DNA damaging ionizing radiation<sup>16</sup>,  
59 each at prenatal stages. The latter furthermore exemplifies the extraordinary sensitivity of the brain  
60 to DNA damage, especially during the earliest stages of embryonic neurogenesis<sup>17</sup>.

61 Premature neuronal differentiation also often underlies microcephaly because it contributes to  
62 deplete the pool of neural progenitor cells (NPCs). This can be triggered by changes in the orientation  
63 of the mitotic spindle of radial glial cells (RGCs)<sup>18</sup> a type of NPCs in the embryonic neocortex. An  
64 increase of asymmetric divisions can result in the precocious generation of neurons at the expense of  
65 new RGCs, an imbalance that is often observed in primary microcephaly<sup>19</sup>. In contrast, microcephaly  
66 associated with early embryonic DNA damage has so far been proposed to result only from apoptosis  
67 because of the low threshold of NPCs to activate apoptosis<sup>20,21</sup> as a way to maintain brain genome  
68 integrity. Whether premature neuronal differentiation can also be induced in response to embryonic  
69 DNA damage has so far not been demonstrated *in vivo*.

70 During neurogenesis, the differentiation of RGCs involves delamination from the apical membrane  
71 followed by radial migration towards the pial surface. This strongly resembles EMT<sup>22</sup>, a process  
72 during which epithelial cells lose their intercellular junctions and apical-basal polarity, reorganize  
73 their cytoskeleton and shape and reprogramme gene expression<sup>23</sup>. EMT is also often activated  
74 during cancer progression. An analogous mechanism underlies the proneural-mesenchymal  
75 transition (PMT) often seen in recurrent glioma with a worse prognosis, and which can be induced by  
76 radiotherapy<sup>24,25</sup>.

77 In this study, we show that irradiation during early neurogenesis leads to microcephaly as a  
78 consequence of p53-dependent apoptosis and premature neuronal differentiation. A functional  
79 genomics approach demonstrates that these two cellular outcomes depend on the regulation of both  
80 apoptosis- and differentiation-related gene signatures. The latter overlaps significantly with those  
81 activated during DNA damage-induced differentiation of mouse embryonic stem cells (ESCs). We  
82 furthermore observe molecular and cellular changes reminiscent of EMT and PMT. This indicates that

83 the developing brain during early neurogenesis responds to ionizing radiation in a manner similar to  
84 that of gliomas and glioma-like stem cells.

85

## 86 **Results**

### 87 Prenatal irradiation causes DNA damage, a transient G2/M arrest, apoptosis and ultimately 88 microcephaly

89 In agreement with previous observations<sup>26</sup>, irradiation of C57BL/6 mouse fetuses at embryonic day  
90 11 (E11) resulted in a mild general growth deficit (male 6.8%, female 8.9%; Fig. 1a) as seen in 10-day  
91 old (P10) mice, and a strongly reduced brain weight (male 27%, female 27%; Fig. 1b), even after  
92 normalization for body weight (male 22%, female 20%; Fig. 1c). These observations were similar for  
93 male and female mice, indicating that there was no gender effect of radiation exposure on brain  
94 development.

95 Immunostaining for the DNA double-strand break (DSB) repair marker 53BP1 revealed a significant  
96 increase in DSB foci at 1 h and 2 h post-irradiation, which almost completely returned to baseline  
97 within 6 h (Fig. 1d, e). This coincided with a strong reduction in the number of phospho-histone 3  
98 (PH3) positive apical and basal mitoses within the first 2 h (Fig. 1f, g), indicating that cell cycle arrest  
99 lasted for at least 2 h and was released after 6 h (Fig. 1g). To further investigate the cell cycle arrest,  
100 pregnant mice were injected with BrdU immediately before irradiation. A double immunostaining for  
101 incorporated BrdU and for PH3 was then performed at 2 h post-irradiation to calculate the number  
102 of cells that were irradiated while in S-phase (BrdU-positive cells, BrdU+) and progressed to mitosis  
103 (PH3+ cells). The 2-h time point was chosen because G2 and M-phase combined take around 2 h in  
104 the embryonic mouse brain<sup>27</sup>. Whereas the percentage of BrdU+ cells was similar in irradiated and  
105 control mice (Fig. 1h), the fraction of BrdU+/PH3+ cells over the total number of BrdU+ cells (mitotic  
106 index) showed a dramatic decrease after irradiation (Fig. 1i). This, together, indicated that cell cycle  
107 arrest was mostly due to cells arrested at the G2/M checkpoint, similar to what was found in mice  
108 irradiated at E14.5<sup>28</sup>.

109 Between 6 h and 24 h following irradiation, a strong increase in apoptosis was observed as compared  
110 to unirradiated controls, as analyzed by TUNEL (Fig. 1j, k) and cleaved caspase-3 immunostaining (Fig.  
111 1l, m). This showed 27% and 14.8% of apoptotic cells in the neocortex at 6 h and 24 h post-  
112 irradiation, respectively. Importantly, at none of the investigated time points apoptosis was seen  
113 among the cells lining the ventricle lumen, showing that mitotic cells did not undergo apoptosis.

114 At one week after irradiation, the presence of apoptotic cells was no longer evident (data not  
115 shown), highlighting the transient nature of the immediate and direct effects of acute DNA damage.  
116 However, we previously showed that mice exposed to radiation at E11 have a reduced cortical  
117 thickness at this stage<sup>29</sup>. To identify neuronal subtypes that were lost after irradiation at E11, we  
118 performed immunostainings for markers of the different neocortical layers in brains of P2 mice. This  
119 showed that, although the patterning of the neocortex as such was not affected, the number of  
120 early-born Tbr1+ layer 6 (L6) neurons was reduced by 30% in irradiated mice as compared to non-  
121 irradiated controls (Fig. 1n, p). In contrast, the number of neurons in the more superficial layers  
122 (Ctip2, L5; Satb2, L2-4) were not affected (Fig. 1o, p). The reduction of Tbr1+ cells is consistent with  
123 loss of cells within the first day after irradiation at E11, which is around the birthdate of L6 neurons  
124<sup>30</sup>. This reduction may, at least in part, be assigned to apoptosis. Together, these results confirmed  
125 the sensitivity of the brain to acute DNA damage (via radiation-induced DSBs) during the earliest  
126 stages of neurogenesis.

127

128 Targeted *Trp53* inactivation in the embryonic dorsal forebrain partially restores DNA damage-  
129 induced microcephaly

130 The activation of cell cycle arrest and apoptosis following DNA damage pointed to the involvement of  
131 p53 in the early response to radiation<sup>29,31</sup>. Consequently, we hypothesized that genetic inactivation  
132 of *Trp53* would abrogate the negative effects of radiation on brain development. For this, we  
133 generated mice in which *Trp53* was conditionally knocked out in the neurons of the dorsal forebrain,  
134 *Emx1-Cre; Trp53<sup>fl/fl</sup>* (cKO) mice (Fig. 2a), which we compared to *Trp53<sup>fl/fl</sup>* (referred to as WT)  
135 littermates. Phospho-p53 staining demonstrated that loss of *Trp53* expression was lost only in the  
136 dorsal telencephalon precursors in cKO mice (Fig. 2b). Brains of unirradiated WT and cKO mice were  
137 similar at P1, suggesting that forebrain-specific removal of p53 did not affect overall brain  
138 development. After irradiation at E11, cortices of WT mice were 28% smaller than those of sham-  
139 irradiated mice (Fig. 2c-e). However, those of irradiated cKO mice were only 15% smaller (Fig. 2c-e),  
140 indicating a significant, partial rescue of the microcephalic phenotype. In WT mice irradiated at E14,  
141 cortex size was reduced with 18% (Fig. 2f), indicating reduced radiation sensitivity of E14 compared  
142 to E11 brains. This has also been reported in *Topbp1<sup>-/-</sup>* mice which are more susceptible to radiation-  
143 induced apoptosis at E11 compared to E14<sup>32</sup>. Furthermore, at E14 when a larger fraction of cortical  
144 and hippocampal cells are *Trp53* null (Fig. S1), no difference could be observed in cortical size  
145 between irradiated cKO mice and sham-irradiated WT or cKO mice (Fig. 2f). These results suggest  
146 that while p53 seems dispensable for normal brain development, its inappropriate hyperactivation  
147 via DSBs leads to defective regulation of normal brain size.

148 Genetic inactivation of *Trp53* neither affected the induction nor the fast component of DSB repair  
149 (Fig. 2g, h), indicating that these are p53-independent. The induction of cell cycle arrest, however,  
150 was less efficient in cKO mice. Whereas in WT mice the numbers of apical and basal mitoses were  
151 reduced by 70% and 66%, respectively, at 2 h post-irradiation, in cKO mice the number of apical  
152 mitoses was reduced by 44%, with no significant difference in basal mitoses (Fig. 2i, j). After 6 h, the  
153 number of both basal and apical mitoses was increased in irradiated cKO mice compared to  
154 irradiated WT mice (Fig. 2k) while no difference was found in the number of mitotic cells between  
155 unirradiated and irradiated cKO mice (Fig. 2k). In agreement with p53 as a critical regulator of  
156 apoptosis, the number of apoptotic cells was drastically decreased in the dorsal telencephalon of  
157 irradiated cKO mice compared to their WT littermates at 6 h after irradiation (Fig. 2l, m). In the more  
158 lateral part of the pallium and ganglionic eminences, however, apoptosis was widespread and  
159 comparable between irradiated WT and cKO mice (Fig. 2l, m). This may at least partly explain the fact  
160 that dorsal forebrain-specific inactivation of *Trp53* only partially rescued the brain size reduction in  
161 irradiated mice.

162 Whole transcriptome analysis reveals activation of a p53 signature after irradiation

163 To obtain more insight in the molecular mechanisms underpinning the aforementioned cellular and  
164 phenotypic changes we performed comparative genome-wide temporal RNA sequencing (RNA-seq).  
165 Changes in cortical gene expression were analyzed at 2, 6 and 12 h after irradiation of WT and cKO  
166 mice in comparison with sham-irradiated controls. In WT mice the majority of the dysregulated genes  
167 were upregulated after irradiation (Fig. 3a). Among these, 238 (after 2h), 316 (after 6 h), and 124  
168 genes (after 12 h) were differentially expressed (adjusted *p*-value <0.05) between control and  
169 irradiated mice (Fig. S2a, S2b and Tables S1-S3). In total, 111 out of 357 (31%) differentially expressed  
170 genes overlapped between at least two time points. In contrast, only 4 out of 155 downregulated  
171 genes (2.7%) overlapped between different time points (Fig. S2b and Table S1-S3). Thus, our results

172 showed a very dynamic transcriptional response to radiation. Compared to our previous study, in  
173 which we identified a radiation-responsive gene signature using microarrays<sup>31</sup>, the large majority of  
174 those genes (77 out of 83) were also identified by RNA-seq (Fig. S2c). Most of the newly identified  
175 genes changed less than 2-fold (Fig. S2d) indicating the enhanced sensitivity of RNA-seq over  
176 microarrays.

177 Further, and in accordance with our previous study<sup>31</sup>, the activated sets of genes were mostly  
178 dependent on p53 (Fig. 3b), especially after 2 h. The induction of p53-dependent genes was most  
179 pronounced (in terms of fold-change) after 2 h, and declined from 6 h onwards (Fig. S2e). Although  
180 p53-dependent genes were also activated in cKO embryonic brains (Fig. S2f), their expression was  
181 overall ~1.3-fold decreased in irradiated cKO embryos compared to WT (Fig. S2g, h). This matched  
182 with the observed ~1.3-fold reduction of Trp53 expression in cKO mice (Fig. S2h) suggesting that  
183 indeed p53 activation did not occur in the *Trp53* null fraction of cells in forebrains of cKO mice. We  
184 also investigated the effect of radiation on microRNA expression. Two hours after exposure, both  
185 increased and decreased expression of a number of microRNAs could be observed (Fig. S3a) of which  
186 miR-34a, a well-known p53 target<sup>33,34</sup>, was the most significant (Fig. S3b).

187 Gene expression profiles at 6 and 12 h were more similar to each other compared to that of 2 h post-  
188 irradiation (Fig. 3c and S2e) which was also reflected by the functional enrichment analysis. A  
189 classical p53-mediated response (cell cycle arrest, DNA repair, apoptosis) was observed after 2 h,  
190 while genes involved in the G2/M checkpoint were downregulated after 6 and 12 h (Fig. 3b, 3d-e),  
191 supporting the release of cell cycle arrest observed at 6 h. Apoptosis-related genes were induced at  
192 all time points while genes involved in the immune response were activated at later time points (Fig.  
193 3b, 3d-e). A Gene Set Enrichment Analysis (GSEA)<sup>35</sup> using curated gene sets from the MSigDB  
194 database indicated induction of genes related to radiation exposure and p53 activation at all time  
195 points (Fig. S4). The most significant overlap in this analysis was found with results from our previous  
196 study<sup>31</sup>, demonstrating the reproducibility of our data (Fig. S4). Interestingly, we also noticed at all  
197 time points an upregulation of genes involved in biological processes such as neurogenesis and  
198 cellular differentiation (Fig. 3e) as well as genes encoding neuronal markers (Fig. S4a, b). This  
199 coincided with a reduced expression of targets of the pluripotency regulator MYC (Fig. 3e, S4b), and  
200 other embryonic stem cell (ESC) and pluripotency gene signatures (Fig. S4). Our transcriptome  
201 analysis thus indicated that after irradiation, p53 quickly activates a classical DDR which attenuates  
202 as DNA damage repair progresses. On the other hand, a more sustained induction of genes related to  
203 neurogenesis was observed suggesting that radiation-induced neuronal differentiation may  
204 represent an additional mechanism to limit proliferation of genomically instable cells.

#### 205 Radiation exposure leads to p53-dependent premature neuronal differentiation

206 To investigate whether aberrant neuronal differentiation occurred in brains of irradiated fetuses, we  
207 quantified the population of RGCs (Pax6+), intermediate progenitors (IPs) (Tbr2+) and immature  
208 post-mitotic neurons (Dcx+, Tbr1+) in C57BL/6 embryos. The fraction of Pax6+ RGCs was reduced 6 h  
209 and 24 h following exposure (Fig. 4a, b). No difference was seen in the fraction of Tbr2+ IPs after 6 h  
210 (Fig. 4c, d), while ectopic Dcx+ and Tbr1+ cells could be observed in the VZ of irradiated mice (Fig. 4e-  
211 i). The cellular fate of neuronal progenitors partly depends on their plane of mitotic division,  
212 especially during the critical time window at the early stages of neurogenesis when oblique spindle  
213 orientation leads to direct neurogenesis and depletion of the progenitor pool<sup>36</sup>. Hence, mitotic  
214 spindle orientations were measured using double immunostaining for PH3 and the centrosomal  
215 protein  $\gamma$ -tubulin (Fig. 4j). In line with the observed increase in ectopic neurons, the fraction of  
216 horizontally dividing cells (i.e. mitotic cleavage plane <30°) was increased in irradiated brains (Fig.



217 4k). This, together with the fact that the number of IPs was not changed, indicated that DNA damage  
218 induces direct neurogenic divisions of RGCs.

219 We then investigated whether activation of p53 regulated the process of radiation-induced  
220 premature neuronal differentiation, as suggested by our RNA-seq analysis. For this, some of the  
221 immunofluorescence experiments were repeated using *Trp53* WT and cKO mice. As in C57BL/6 mice,  
222 the fraction of Pax6+ RGCs was reduced in irradiated WT mice, both at 6 h and 24 h following  
223 irradiation (Fig. 5a-c). However, irradiated cKO mice did not show a decrease in RGCs compared to  
224 non-irradiated WT or cKO mice (Fig. 5a-c). Similarly, whereas ectopic immature Dcx+ neurons could  
225 be observed in irradiated WT mice, this was not the case in irradiated cKO littermates (Fig. 5d, e).  
226 These results indicated that radiation-induced premature neuronal differentiation was mediated via  
227 p53. To investigate whether RGCs increased their proliferation rate as a possible compensatory  
228 mechanism to account for loss of the progenitor pool, we analyzed S-phase duration and total cell  
229 cycle length using a cumulative EdU/BrdU pulse labeling approach (Fig. 5f). This indicated that, at  
230 least at 24 h after irradiation, neither the length of the cell cycle nor of the S-phase were affected  
231 (Fig. 5g, S5).

232 A potential role of p53 in radiation-induced neuronal differentiation had previously also been  
233 suggested based on *in vitro* experiments<sup>37,38</sup>. We confirmed these results, and showed that  
234 irradiation of primary mouse NPCs (with 1 Gy of X-rays) diminished proliferation and induced  
235 differentiation from bipolar cells into multipolar neurons (Fig. S6a). Likewise, irradiation of Neuro-2a  
236 neuroblastoma cells (with 8 Gy of X-rays) arrested their proliferation and augmented multipolar  
237 neurite outgrowth, thereby resembling differentiated neurons, rather than bipolar NPC-like cells that  
238 were observed when Neuro-2a cells differentiated in the presence of retinoic acid (Fig. S6b). Pre-  
239 treatment of Neuro-2a cells with the p53 inhibitor alpha-pifithrin ( $\alpha$ -PFT), reduced neurite outgrowth  
240 indicating that this is p53-dependent (Fig. S6c). Together, our results strongly suggested that p53  
241 status not only influences DNA damage-induced cell cycle arrest and apoptosis, but also premature  
242 neuronal differentiation. We therefore propose that p53 activation is responsible for premature  
243 differentiation of NPCs in response to acute radiation-induced DNA damage.

#### 244 Convergence and divergence of gene expression changes in prenatally irradiated and *Magoh*<sup>+/-</sup> 245 microcephalic mice

246 Gene expression changes in irradiated mouse brains overlap significantly<sup>31</sup> with those observed in  
247 the genetic microcephaly mouse model *Magoh*<sup>+/-</sup><sup>39</sup>. This suggests that the converging phenotypic  
248 features (i.e. apoptosis, premature neuronal differentiation and microcephaly) directly originate from  
249 these transcriptional changes. However, in a follow-up study of the *Magoh*<sup>+/-</sup> mouse model it was  
250 shown that prolonged mitosis, as is seen in *Magoh*<sup>+/-</sup> NPCs induces p53-dependent apoptosis, while  
251 premature neuronal differentiation was found to be p53-independent<sup>40</sup>. We therefore hypothesized  
252 that radiation induced a specific p53-dependent gene signature responsible for premature neuronal  
253 differentiation.

254 Thus, we re-evaluated here the previously observed overlap in gene expression changes between  
255 prenatally irradiated brains and embryonic brains of *Magoh*<sup>+/-</sup> mice<sup>31</sup>, now distinguishing between  
256 genes that were commonly upregulated in irradiated and *Magoh*<sup>+/-</sup> mice (*Overlap*), genes that were  
257 only upregulated in *Magoh*<sup>+/-</sup> mice (*Magoh\_unique*) and genes that were only upregulated in  
258 irradiated mice (*IR\_unique*) (Fig. 6a). Transcription factor enrichment analysis showed that *Overlap*  
259 genes are mainly regulated by p53 (Fig. 6b) and involved in typical p53-mediated pathways such as  
260 DNA damage response, apoptosis and cell cycle checkpoints (Fig. 6c and Table S4). Also the *IR\_unique*  
261 genes were highly enriched among p53 targets (Fig. 6d). However, these correlated not only with

262 classical p53-related functions but also forebrain development and neurogenesis (Fig. 6e and Table  
263 S5). In contrast, *Magoh\_unique* genes, were enriched in targets of erythroid differentiation factors  
264 like EKLF, GATA1 and TAL1 as well as critical pluripotency factors like MYC and OCT-4 (Fig. 6f), and in  
265 biological functions related to ribosome biogenesis and cell proliferation (Fig. 6g and Table S6). Of  
266 note, MYC targets were downregulated in the brains of irradiated mice (Fig. S3).

267 To further discern differences between these three gene sets, we evaluated their expression profiles  
268 during normal embryonic brain development and in mouse ESCs undergoing DNA damage-induced  
269 differentiation. In both these cases, *Magoh\_unique* genes and radiation-induced genes (*Overlap +*  
270 *IR\_unique* genes) showed completely opposite expression profiles. GSEA analysis demonstrated that  
271 *Magoh\_unique* genes are extensively downregulated (FDR  $q < 0.001$ ) during brain development. In  
272 contrast, *Overlap* (FDR  $q = 0.01$ ) and especially *IR\_unique* genes (FDR  $q < 0.001$ ) showed a strong  
273 upregulation (Fig. 6h), which is typical for genes involved in neuron differentiation<sup>31</sup>. Also in mouse  
274 ESCs undergoing DNA-damage induced differentiation we observed a strong upregulation of  
275 radiation-induced genes while *Magoh\_unique* genes were mostly downregulated (Fig. 6i). In line with  
276 this, it was recently shown that p53 regulates the elongated G1 phase of pluripotent ground state  
277 ESCs, which is lost during culture in serum-supplemented conditions or by inactivating p53<sup>41</sup>.  
278 Evaluation of the expression patterns of the three gene signatures in WT versus *TP53*<sup>-/-</sup> ground state  
279 and serum ESCs<sup>41</sup> revealed that *Overlap* genes were strongly downregulated by *TP53* knockout in  
280 both cell lines (Fig. S7c, d, g), while *Magoh\_Unique* genes were mostly affected by the cell culture  
281 conditions (Fig. S7e, f, g). *IR\_Unique* genes, on the other hand, were both significantly reduced by  
282 loss of P53 and highly changed by serum supplementation (Fig. S7a, b, g). The fact that the effect of  
283 the *TP53* knockout on these genes was more pronounced in ground state ESCs argues for a potential  
284 role in nervous system development as this pathway was especially affected in these cells<sup>41</sup>.

285 Furthermore, our GSEA analysis (Fig. S4) indicated large similarities between the radiation-induced  
286 gene expression profile and that of other relevant experimental models. These include the  
287 neuroepithelium of knockout mice for the negative p53 regulator *Mdm4*<sup>42</sup> and neural stem cells  
288 (NSCs) deficient for the neurogenesis regulator *Tlx*<sup>43</sup> which interacts with the p53 pathway to control  
289 postnatal NSC activation<sup>44</sup>. Intersectional analysis showed indeed that *Overlap* and *IR\_unique* genes  
290 were in general upregulated in these conditions, whereas *Magoh\_unique* genes were not (Fig. 6j, k).  
291 Also, a recent study investigated time-dependent gene expression responses in neural crest cells  
292 displaying constitutively moderate p53 activation<sup>45</sup>. Again, we observed a substantially higher  
293 overlap with this model between *Overlap* and *IR\_unique* genes, than with *Magoh\_unique* genes (Fig.  
294 6l). Altogether, these results show that both convergent and divergent gene expression changes  
295 occur in the brains of irradiated and those of *Magoh*<sup>+/-</sup> mouse embryos. This may explain the  
296 phenotypic similarities (p53-dependent apoptosis) and differences (p53-dependent neuronal  
297 differentiation) between these models.

#### 298 Radiation induces an EMT-like mechanism in the embryonic brain reminiscent of the radiation- 299 induced PMT in GSCs

300 Another important developmental pathway that was affected in the brains of irradiated mice was  
301 EMT (Figs. 3d, S4c). RNA-seq showed a time-dependent upregulation of EMT hallmark genes and  
302 mesenchymal markers such as *Acta2*, *Cthrc1*, *Exoc4*, *Lum*, *Myl9*, *Serpine2*, *Spp1*, and *Tagln* in brains  
303 of irradiated mice, especially at the later time points (Fig. 7a). Delamination of RGCs from the apical  
304 membrane to allow radial migration of post-mitotic cells to the basal membrane resembles EMT<sup>22</sup>.  
305 This coincides with changes in expression of AJ proteins and disruption of the apical AJ belt<sup>46,47</sup> as is  
306 also observed when embryonic mouse brains are infected with the non-structural protein NS2A of  
307 the Zika Virus (ZIKV-NS2A)<sup>48</sup>. This impairs cortical neurogenesis through premature differentiation of



308 RGCs by disrupting AJ formation and reduced expression of AJ components such as ZO-1 and  $\beta$ -  
309 catenin<sup>48</sup>.

310 To further investigate whether radiation induced an EMT-like mechanism, we analyzed protein levels  
311 of AJ components and markers of EMT using western blotting. At 6 h after irradiation, expression of  
312 several proteins, including ZO-1, E-Cad,  $\beta$ -catenin and Qki5 were significantly reduced whereas  $\alpha$ -  
313 catenin and N-Cad were not changed (Figs. 7b, c). This very much resembled the expression pattern  
314 of these proteins in ZIKV-NS2A infected microcephalic brains<sup>48</sup>. Moreover, immunostaining for  $\beta$ -  
315 catenin and N-Cad demonstrated that the integrity of the AJ belt was disturbed in brains of irradiated  
316 mice leading to an apparent delamination of cells from the ventricular surface (Figs. 7d, S8).

317 In brain tumors (gliomas), a mechanism resembling EMT is responsible for therapy resistance and  
318 cancer recurrence. PMT is the shift of glioma stem-like cells (GSCs) of the proneural subtype to the  
319 more aggressive mesenchymal subtype<sup>49</sup>. PMT can be induced by radiation both in mice<sup>24</sup> and  
320 humans<sup>25</sup>. Halliday et al. showed that irradiation of proneural glioma in mice induces a p53-  
321 dependent DDR as well as a STAT3- and CEBP-dependent PMT<sup>24</sup>. Interestingly, most of the highly  
322 induced genes in irradiated glioma are among the top genes induced in irradiated embryonic mouse  
323 brains, in particular after 2 h and decreasing over time (Fig. S9a). These genes represent the p53-  
324 mediated DDR. Besides this, our RNA-seq results (Fig. 7e, f) and a GSEA analysis (Fig. S4c, S9b)  
325 showed that after 12 h the expression of proneural GSC markers such as *Ascl1*, *Bcan*, *Gpr17* and  
326 *Ttyh1* was reduced while mesenchymal GSC markers like *Alox5*, *Casp1*, *Lgals3* and *Ltbp2* were  
327 upregulated. Hence, our results demonstrate that the transcriptional response to radiation is very  
328 similar between the embryonic mouse brain and proneural glioma in adult mice.

329

## 330 Discussion

331 The embryonic brain is very sensitive to DNA damage, especially DSBs. The occurrence of excessive  
332 DSBs during embryonic development is therefore a major cause of neurodevelopmental diseases,  
333 which often display microcephaly<sup>20,21</sup>. The main underlying mechanism, as in many other  
334 developmental syndromes associated with microcephaly<sup>5</sup>, is (hyper)activation of p53 leading to  
335 apoptosis of NPCs and a depletion of the neuronal progenitor pool. In this study, acute DNA damage  
336 induced by X-irradiation of mouse embryos at the start of neurogenesis leads to microcephaly  
337 resulting from a combination of apoptosis and p53-dependent premature neuronal differentiation.

338 The induction of ectopic neurogenesis was evident from a reduction in the number of Pax6+ RGCs,  
339 and the presence of Dcx+ and Tbr1+ immature neurons in the VZ of irradiated mice, coinciding with  
340 an increase in asymmetrically dividing RGCs. Here, we found that both apoptosis and premature  
341 neuronal differentiation were prevented by genetic inactivation of *Trp53* in the dorsal forebrain,  
342 resulting in a less severe microcephalic phenotype. The role of p53 in radiation-induced premature  
343 neuronal differentiation was furthermore supported by a functional genomics screen. We suggest  
344 that genes belonging to the *IR\_unique* gene set are responsible for radiation-induced neuronal  
345 differentiation, which is strengthened by the fact that this gene set is also highly enriched during  
346 normal brain development and in several models of differentiating ESCs. Potential candidate genes  
347 are, among others, *Bloc1s2* and *Fbxw7*, both of which activate neuronal differentiation of NPCs by  
348 inhibition of Notch1 signaling<sup>50,51</sup>; *Btg2/Tis21*, which is a pro-differentiation gene that induces  
349 premature onset of consumptive divisions of NSCs and microcephaly<sup>52</sup>; *Baiap2/IRSp53* which  
350 promotes filopodia and neurite formation<sup>53</sup>; *Nexmif/Kidlia*, an X-linked intellectual disability gene  
351 which regulates neurite outgrowth<sup>54</sup>; *Nanos1*, an RNA-binding protein which promotes neurogenesis

352 <sup>55</sup>, and *Arap2*, of which the human ortholog is one of 64 genes enriched in human outer radial glia <sup>56</sup>.  
353 Additionally, this gene set comprises currently uncharacterized p53 target genes of which some, like  
354 *D630023F18Rik* (*C2orf80* in humans) and *Sec14l5*, are highly upregulated during normal mouse brain  
355 development and neuronal maturation <sup>31</sup>. Notably, these genes may contribute to DNA damage-  
356 induced neuronal differentiation and therefore represent important targets for functional  
357 characterization.

358 Radiation-induced neuronal differentiation has been demonstrated *in vitro* <sup>37,38,57,58</sup> although the  
359 underlying mechanisms remained largely unclear. To our knowledge, this is the first study  
360 demonstrating the activation of a p53-dependent transcriptional program as a mechanism to induce  
361 neuronal differentiation *in vivo*, although a role for p53 in cellular differentiation *in vivo* has been  
362 previously proposed in mammary stem cells, the airway epithelium and cancer stem cells <sup>6</sup>. Recently,  
363 it was also shown that high doses of radiation could drive ATM-dependent differentiation of  
364 neuroblasts in the adult SVZ <sup>59</sup>. Since ATM is the major activator of p53 in response to radiation-  
365 induced DSBs, it is also possible that this apparent ATM-dependence in fact reflects the effect of p53.

366 While the ultimate fate of the prematurely differentiated cells is unclear (e.g. functional integration,  
367 senescence, death), an important question is what underlies the cell's decision to undergo either  
368 apoptosis or differentiation. Based on our results, it is tempting to speculate that the induction of  
369 apoptosis and differentiation gene signatures does not occur in the same cells. Transcriptomic  
370 analysis at the single cell level may answer this. Even then, the question remains what drives p53 to  
371 activate either of these signatures. Different possible explanations exist. For instance, the level of  
372 activation of p53 and its targets, the duration of their expression and the cellular context,  
373 irrespective of the amount of damage, may determine whether a cell undergoes cell cycle arrest or  
374 apoptosis <sup>60</sup>. Indeed, specific sets of downstream target genes which influence cell fate may be  
375 activated in a cell-specific manner depending on (i) the dynamic behavior of p53 expression <sup>61</sup>, (ii)  
376 posttranslational modifications of the p53 protein itself <sup>62</sup> -mutant mice mimicking constitutive p53  
377 acetylation have neuronal apoptosis and microcephaly <sup>63</sup>-, or (iii) the activation of specific splice  
378 variants of p53 explaining some of its pleiotropic activities <sup>64</sup>. It is, however, also possible that other  
379 cell-autonomous mechanisms, such as differences in their signaling landscape modulate the cell-  
380 specific choice between different p53-dependent transcription programs <sup>4</sup>. Another important  
381 question that remains to be answered is the extent to which radiation-induced premature  
382 differentiation contributes to the reduction in brain size. The fraction of prematurely differentiating  
383 cells seems lower than that of the apoptotic ones. One may therefore conclude that its contribution  
384 is smaller. However, if premature differentiation of an RGC would prevent it from subsequent rounds  
385 of division, it may still have a considerable impact. Also, if prematurely differentiated cells ultimately  
386 undergo apoptosis, then part of the observed apoptotic cells was prematurely differentiated in the  
387 first place. If possible, it would be interesting to generate a model in which only premature  
388 differentiation, but not apoptosis could be prevented in order to calculate the respective  
389 contributions of each of these cell fates to the phenotype.

390 The lack of an obvious brain phenotype in p53 cKO mice supports the idea that p53 is essentially  
391 dispensable for proper brain development *per se*, although it has been reported that a subset of p53-  
392 deficient animals develop exencephaly, a neural tube closure defect <sup>65,66</sup>. This discrepancy may be  
393 explained by the fact that in the *Emx1-Cre* model recombination only occurs at E9.5, when neural  
394 tube closure has already terminated. Thus, ablation of p53 at the stage of corticogenesis does not  
395 impact brain size and correct layering of the neocortex. Another explanation may be that although  
396 p53 expression levels are high during early brain development, its activation is very strictly controlled  
397 in the absence of cellular stress such that p53 activity is inherently low anyway <sup>67</sup>.

398 During neurogenesis, RGCs have an apicobasal polarity and delaminate from the apical membrane by  
399 downregulation of AJ complex proteins<sup>22</sup>. This process shares features with that of EMT and it has  
400 been shown that an EMT-like process precedes delamination of differentiating RGC daughter cells  
401 and their radial migration<sup>46</sup>. We found that in irradiated mice, several classical genes involved in EMT  
402 are induced. Also, AJ complex proteins such as E-Cad, ZO-1 and  $\beta$ -catenin were downregulated and  
403 disruption of apical AJs could be observed. This is very similar to the reduction in ZO-1 and  $\beta$ -catenin,  
404 but not N-Cad seen in ZIKV-NS2A infected embryonic mouse brains, displaying premature  
405 differentiation of RGCs<sup>48</sup>. The exact mechanism responsible for this EMT-like process still remains  
406 elusive. One possibility is that the AJ disruption is a secondary effect of apoptosis of nearby cells in  
407 the ventricular zone. During normal embryonic development, apoptosis is very important for correct  
408 morphogenesis and apoptotic cells can exert mechanical forces on the surrounding tissue which may  
409 affect cell-cell adhesion<sup>68</sup>.

410 The transcriptional response of the embryonic mouse brain to radiation very much resembled that of  
411 irradiated mouse glioma which was characterized by a p53-dependent apoptotic response and a p53-  
412 independent EMT-like mechanism driving a shift from proneural to mesenchymal cells<sup>24</sup>. In recent  
413 years, it has been postulated that the GSCs that confer glioma treatment resistance and tumor  
414 recurrence may arise from NSCs in the adult SVZ<sup>69</sup>. Importantly, two new studies showed that  
415 glioblastomas –high-grade gliomas- contain (outer) radial-glia-like cells<sup>70,71</sup> which were hypothesized  
416 to be the cells of origin for glioblastoma development. Our observation of the pronounced  
417 similarities between the radiation response of the embryonic mouse brain and that of gliomas,  
418 supports this hypothesis. It furthermore indicates that the developing mouse brain may be used as a  
419 proxy to investigate certain aspects of glioma development and treatment response.

420 In summary, we have identified a novel *in vivo* role for p53 in activating neuronal differentiation via  
421 transcriptional regulation of differentiation-related genes in response to radiation-induced DNA  
422 damage. Further investigation of the specific functions of some of these genes in brain development  
423 under normal and genotoxic conditions and the mechanism responsible for the activation of a p53-  
424 dependent differentiation program are of pivotal importance to better understand p53-associated  
425 syndromes and to propose potential preventive strategies.

426

## 427 **Materials and methods**

428

### 429 **Mouse husbandry**

430 All animal experiments were handled in accordance with the Ethical Committee Animal Studies of the  
431 Medanex Clinic (EC\_MxCl\_2014\_036). All of the animal experiments were carried out in compliance  
432 with the Belgian laboratory animal legislation and the European Communities Council Directive of 22  
433 September 2010 (2010/63/EU). C57BL/6J mice were purchased from Janvier (Bio Services, Uden, The  
434 Netherlands). *Trp53* brain conditional knock-out (cKO) mice were obtained by breeding *Trp53<sup>fl/fl</sup>* mice  
435 (The Jackson Laboratory, Stock No. 008462) to *Emx1-Cre* mice (The Jackson Laboratory, Stock No.  
436 005628). Mutants were genotyped by PCR. All the mice were housed under standard laboratory  
437 conditions with 12-h light/dark cycle. Food and water were available *ad libitum*. Female and male  
438 mice were coupled during a 2-h time period in the morning, at the start of the light phase (07:30 to  
439 09:30 am) in order to ensure synchronous timing of embryonic development. The morning of  
440 coupling was considered embryonic day 0 (E0).

441

### 442 **Cell culture**

443 For culturing adherent primary mouse NPCs fetal brains were dissected from E15 mouse fetuses and  
444 prefrontal cortices were separated. These were dissociated by gentle pipetting in Accutase (A6964,  
445 Sigma) and NPCs were cultured as monolayers in proliferation medium consisting of Dulbecco's  
446 Modified Eagle Medium (DMEM)/F-12 with Glutamax (31331-093, Gibco) supplemented with 1x B-27  
447 (17504-044, Gibco), 1x N-2 supplement (17502-048, Gibco), 10 ng/ml of recombinant murine  
448 Epidermal Growth Factor (EGF, 315-09, Peprotech) and 20 ng/ml recombinant human Fibroblast  
449 Growth Factor-basic (FGF-2, 100-18B, Peprotech) onto poly-Lysine D coated cell culture plates  
450 (Corning). Cells were subcultured every 3 to 4 days when they reached 70-80% confluence.

451 Neuro-2a cells were cultured in DMEM (61965-026, Gibco) supplemented with 10% fetal bovine  
452 serum (FBS, 10270-106, Gibco) and 1x non-essential amino acids (NEAA, 11140-035, Gibco)  
453 (proliferation medium) at 37°C with 5% CO<sub>2</sub>. For differentiation experiments, cells were subcultured  
454 in differentiation medium consisting of DMEM with 1% FBS (Gibco) and 1x NEAA (Gibco)  
455 supplemented with 10 μM of freshly added retinoic acid (R2625, Sigma). For experiments using the  
456 p53 transcriptional inhibitor α-pifithrin (α-PFT; P4236, Sigma-Aldrich, Diegem, Belgium), cells were  
457 treated with either 10 mM α-PFT or 1% DMSO 90 min prior to irradiation.

458

### 459 **Irradiation procedures**

460 For irradiation experiments, pregnant dams at E11 or E14 were given a single dose of whole-body  
461 radiation (1 Gy), by using an X-Strahl 320 kV (0.13 Gy/min, inherent filtration: 3 mm of Be, additional  
462 filtration: 3.8 mmAl + 1.4 mm Cu + DAP, tube voltage: 250 kV, tube current: 12 mA, sample distance:  
463 100 cm, beam orientation: vertical) in accordance to ISO 4037. Control mice were taken as well to  
464 the radiation facility but were not placed within the radiation field (sham-irradiation). For all  
465 experiments, embryos from at least two different litters were used as biological replicates.

466 Irradiation of NPCs (1 Gy) was performed using the same settings as for mice, for Neuro-2a cells (8  
467 Gy) a dose-rate of 0.5 Gy/min was used.

468

#### 469 **Brain size assessment**

470 Brain size measurements were performed at postnatal day 1 (P1). The brains of the pups exposed to  
471 radiation *in utero* at E11 or E14 were isolated and imaged on a Leica stereo dissection microscope.  
472 The surface area of both cortices was measured and analyzed using ImageJ.

473

#### 474 **Immunohistochemistry and imaging**

475 Mouse fetuses (E11) or brains of E15 fetuses were harvested and fixed in 4% paraformaldehyde (PFA)  
476 dissolved in phosphate buffered saline (PBS) at 4°C overnight. The samples were then washed three  
477 times (5 min each) with PBS and stored at 4°C in 70 % ethanol till further manipulations. Next, the  
478 samples were processed with the Excelsior™ AS Tissue Processor (Thermo Scientific) and embedded  
479 using the paraffin-based embedding station (Ventana Discovery Ultra, Roche). Following the  
480 embedding, the brains were cut into 7-µm thick coronal sections on a microtome (Microm HM 340 E,  
481 Thermo Scientific), and mounted on SuperFrost™ Plus glass slides (Thermo Scientific).

482 P2 pups were transcardially perfused with a 0.9% NaCl solution and fixed in 4% PFA at 4°C overnight.  
483 After washing, samples were cryopreserved through a 10%-20%-30% series of sucrose dissolved in  
484 PBS, and embedded in frozen section medium (Richard-Allan Scientific™ Neg-50™). P2 brains were  
485 cut into 10-µm thick coronal cryosections (Cryostar NX50, Thermo Scientific) and mounted on  
486 SuperFrost™ Plus glass slides.

487 Before staining, paraffin sections were deparaffinized in xylene, rehydrated in graded solutions of  
488 ethanol, and boiled in citrate buffer, pH6 (Dako) for antigen retrieval. Next, the sections were  
489 incubated three times (5 min each) in permeabilization solution (0.3 % Triton X-100) before blocking  
490 for 2 h either with Normal Goat Serum (Invitrogen) in Tris-NaCl blocking buffer (1:5) or PBS  
491 containing 1 % BSA (Sigma Life Science) and 0.3 % Triton X 100 (Sigma Life Science). After blocking,  
492 the sections were then incubated overnight at 4°C in blocking solution containing the primary  
493 antibody. The following antibodies at the indicated dilution were used: anti-p53 (mouse, 1:100, Santa  
494 Cruz Biotechnology (sc-126)) anti-53BP1 (rabbit, 1:100, Novus Biologicals (NB 100-304ss)), anti-  
495 PH3ser10, (rabbit, 1:1000, Cell Signaling (3377)), anti-Pax6 (rabbit, 1:200, Biolegend (901301)), anti-  
496 DCX (Goat, 1:500, Santa Cruz Biotechnology (sc-8066)), anti-cleaved Caspase-3 (rabbit, 1:100,  
497 Biovision (3015-100)), anti-BrdU (rat, 1:300, Bio-Rad (BU1/75)), anti-Ctip2 (rat, 1:500, Abcam (ab  
498 18465)), anti-Satb2 (mouse, 1/100, Abcam (ab51502)), anti-Tbr1 (rabbit, 1:100, Abcam (ab31940)),  
499 anti-Tbr2 (rabbit, 1:100, Abcam (ab23345)), anti-γ-tubulin (goat, 1:100, Santa Cruz Biotechnology (sc-  
500 7396)), anti-β-catenin (mouse, 1:100, Santa Cruz Biotechnology (sc-7963)), anti-N-cadherin (rabbit,  
501 1:350, Abcam (ab18203)), anti-Tuj1 (mouse, 1:1000, Sigma Life Science (T5076)). The following day,  
502 sections were washed three times (5 min each) with tris-buffered saline, 0.1% Tween20 and  
503 incubated 2 h at room temperature with the appropriate Alexa Fluor-405, -488 or -568 (Invitrogen)  
504 secondary antibody diluted 1:200 in blocking solution. For CC3 staining secondary antibody was  
505 followed by signal amplification using TSA Plus Cyanine 3 System (PerkinElmer). Following the  
506 incubation with the secondary antibody, sections were washed three times (5 min each) and  
507 counterstained for nuclei, with 4'6-diamidino-2-phenylindole (DAPI, Sigma-Aldrich) for 15 min.  
508 Finally, the slides were mounted with mowiol and images were taken using 20x or 40x air objectives  
509 on a Nikon Eclipse Ti-E inverted microscope.

510

## 511 **EdU/BrdU cumulative pulse-labeling experiments**

512 Sequential administration of the thymidine analogues, 5-ethynyl-2'-deoxyuridine (EdU) (Click-iT Plus  
513 EdU Kit, Invitrogen) and 5-bromo-2'-deoxyuridine (BrdU) (Sigma-Aldrich) was used for cell cycle  
514 length assessment. Briefly, pregnant dams (E11) were given intraperitoneal injections of EdU (10  
515 mg/kg of body weight), and BrdU (50 mg/kg of body weight), 22 h and 23.5 h respectively after  
516 irradiation. Half an hour later fetuses were harvested and processed as mentioned above. EdU  
517 detection was done using the Click-iT Plus EdU Alexa Fluor 488 Imaging Kit (Invitrogen) according to  
518 the manufacturer's protocol. Subsequently, BrdU (Alexa 568) and Pax6 (Alexa 405) stainings were  
519 performed as indicated above. The total cell cycle length and duration of S-phase of Pax6 positive  
520 NPCs were calculated as follows: the interval during which cells can incorporate EdU, but not BrdU  
521 ( $T_i$ ) is 1.5 h. The total number of Pax6+ cells (cycling fraction), the number of Pax6+ cells in S-phase (S  
522 fraction, Pax6+ EdU+ BrdU+) and the number of Pax6+ cells in the leaving fraction (L fraction, Pax6+  
523 EdU+ BrdU-) were analyzed using ImageJ. Duration of the S-phase ( $T_s$ ) was then calculated using the  
524 following equations <sup>72</sup>:

$$525 \quad (1) \quad \frac{T_S}{T_L} = \frac{S_{fraction}}{L_{fraction}}$$

$$526 \quad (2) \quad T_S = \frac{S_{fraction}}{L_{fraction}} \times T_L$$

527 Because the ratio of the length of any one period of the cell cycle to that of another period is equal  
528 to the ratio of the number of cells in the first period to the number in the second period, the ratio  
529 between the number of cells in the S fraction and the L fraction is equal to the ratio between  $T_s$  and  
530  $T_i$  (= 1.5 h), and therefore  $T_L = T_i$ .

$$531 \quad (3) \quad T_S = \frac{S_{fraction}}{L_{fraction}} \times 1.5$$

532 This could be used to calculate the total cell cycle length ( $T_C$ ) was calculated using:

$$533 \quad (4) \quad \frac{T_C}{T_S} = \frac{Cycling_{fraction}}{S_{fraction}}$$

$$534 \quad (5) \quad T_C = \frac{Cycling_{fraction}}{S_{fraction}} \times T_S$$

535

## 536 **RNA library preparation for RNA sequencing (RNA-Seq)**

537 For RNA-seq, pregnant dams were (sham-)irradiated at E11 after which they were sacrificed for  
538 dissection of fetuses after 2 h, 6 h and 12 h. For each condition 3 fetuses were used from at least 2  
539 different mothers. Fetal cortices were dissected and stored in RLT Plus lysis buffer (Qiagen) at -80°C  
540 until RNA extraction using the RNeasy Mini Kit (Qiagen). RNA quality was determined using the RNA  
541 nano assay on a 2100 Bioanalyzer (Agilent Technologies). All samples had RNA Integrity Numbers  
542 >9.10. Triplicate RNA-Seq libraries were prepared according to the TruSeq stranded mRNA protocol  
543 (Illumina). Briefly, 200 ng of total RNA was purified using poly-T oligo-attached magnetic beads to  
544 end up with poly-A containing mRNA. The poly-A tailed mRNA was fragmented and cDNA was  
545 synthesized using SuperScript II and random primers in the presence of Actinomycin D. cDNA  
546 fragments were end repaired, purified with AMPure XP beads, A-tailed using Klenow exo-enzyme in  
547 the presence of dATP. Paired end adapters with dual index (Illumina) were ligated to the A-tailed  
548 cDNA fragments and purified using AMPure XP beads. The resulting adapter-modified cDNA



549 fragments were enriched by PCR using Phusion polymerase as followed: 30 s at 98°C; 15 cycles of 10  
550 s at 98°C, 30 s at 60°C, 30 s at 72°C; 5 min at 72°C. PCR products were purified using AMPure XP  
551 beads and eluted in 30 µl of resuspension buffer. One microliter was loaded on an Agilent  
552 Technologies 2100 Bioanalyzer using a DNA 1000 assay to determine the library concentration and  
553 for quality check.

554

### 555 **Bridge amplification, sequencing by synthesis and data analysis**

556 Cluster generation was performed according to the TruSeq SR Rapid Cluster kit v2 (cBot) Reagents  
557 Preparation Guide (Illumina). Briefly, 36 RNA-Seq libraries were pooled together to get a stock of 10  
558 nM. One microliter of the 10 nM stock was denaturated with NaOH, diluted to 6 pM and hybridized  
559 onto the flowcell. The hybridized products were sequentially amplified, linearized and end-blocked  
560 according to the Illumina Single Read Multiplex Sequencing user guide. After hybridization of the  
561 sequencing primer, sequencing-by-synthesis was performed using the Illumina HiSeq 2500 with a  
562 single read 50-cycle protocol followed by dual index sequencing, producing ~782 million 50-bp reads  
563 (~22 million reads per condition). Reads were aligned against the GRCm38 genome using HiSat2  
564 (version 2.0.4)<sup>73</sup>. Counts were generated for each gene from the Ensembl transcriptome analysis of  
565 GRCm38, using htseq-count (version 0.6.0)<sup>74</sup>. Genes with an FDR adjusted  $P < 0.05$  were considered  
566 as differentially expressed.

567 Gene Ontology analysis (Figs. 3e, 6c, 6e, 6g) was performed using the *Investigate Gene Sets* tool from  
568 the MSigDB (v7.0) using GO Biological Process as the reference with FDR q-value  $< 0.05$ . GSEA  
569 analysis<sup>35</sup> was performed with a weighted enrichment statistic and a signal-to-noise metric for gene  
570 ranking. GSEA for Figs. 3d and S3, was performed with MSigDB Hallmark gene sets and curated gene  
571 sets, respectively, based on RNA-seq results. GSEA for Figs. 6h and 6i was performed with microarray  
572 results from embryonic brain development<sup>31</sup> and DNA damage-induced ESC differentiation<sup>75</sup>,  
573 respectively. Transcription factor enrichment analysis to identify transcriptional regulators was  
574 performed using Enrichr<sup>76,77</sup>. Genes significantly upregulated (FDR  $< 0.05$ ) in WT animals were  
575 visualized as a network (Fig. 3b) using Cytoscape (v3.6.1)<sup>78</sup>. Edges between p53 and other genes  
576 were based upon Enrichr analysis. RNA sequence data reported in this paper have been deposited in  
577 the Gene Expression Omnibus (GEO) database (GSE140464).

578

### 579 **Quantitative reverse transcriptase PCR (qRT-PCR)**

580 RNA was extracted from cells using the RNEasy Mini kit (Qiagen) and eluted in 30 µl of RNase-free  
581 water. This was used for cDNA synthesis using the GO-Script Reverse Transcriptase kit (Promega)  
582 using 1 µl of random hexamer primers and 3.75 mM MgCl<sub>2</sub> per 20-µl reaction. Quantitative PCR was  
583 then performed using an ABI7500 Fast instrument and the MESA Green qPCR MasterMix Plus for  
584 SYBR assay (Eurogentec). Relative expression was calculated via the Pfaffl method<sup>79</sup> using *Gapdh* and  
585 *Polr2a* as references gene. Primers used for qRT-PCR are listed in table S7. For all qRT-PCR  
586 experiments the specificity of the primers was validated using a melting curve.

587

### 588 **MicroRNA microarrays and data analysis**

589 Total RNA, including miRNA was isolated from brains of E11 mouse fetuses (3 biological replicates) at  
590 2 h after irradiation using the miRNeasy Mini Kit (Qiagen). RNA was subsequently processed for

591 hybridization to GeneChip miRNA 4.0 microarrays (Affymetrix) using the FlashTag™ Biotin HSR RNA  
592 Labeling Kit (Affymetrix) according to the manufacturer's instructions. Briefly, 1000 ng of total RNA  
593 was used for poly (A) tailing, followed by biotin labeling using the FlashTag™ Biotin HSR Ligation Mix.  
594 Biotin-labeled microRNAs were then hybridized to microarrays at 48°C for 16 h. Microarrays were  
595 washed and stained with streptavidin at 35°C in a Fluidics Station 450 (Affymetrix) and scanned with  
596 a GeneChip Scanner 7G (Affymetrix).

597 Microarray data analysis was performed using Partek Genomics Suite (v7.17.1018). CEL-files were  
598 imported using a customized Robust Multi-array Average algorithm (background correction for probe  
599 sequence, quantile normalization, log<sub>2</sub> transformation of intensity signals). Mouse microRNAs with a  
600  $P < 0.01$  (Student's *t*-test) were considered as differentially expressed.

601

## 602 **Western blotting**

603 Equal amounts of E11 brain homogenates were loaded onto 4-15% TGX precast gels (BioRad) and  
604 transferred to nitrocellulose membranes (or polyvinylidene difluoride for alpha-catenin detection).  
605 Membranes were incubated overnight with antibodies directed to ZO-1 (61-7300, ThermoFisher  
606 Scientific, 1/100), E-cadherin (ab76055, Abcam, 1/200), beta-catenin (sc7963, Santa Cruz  
607 Biotechnology, 1/2500), alpha-catenin (C2081, Sigma-Aldrich, 1/5000), N-cadherin (ab18203, Abcam,  
608 1/1000) and QKI-5 (A300-183A, Bethyl Laboratories, 1/5000), followed by 45 min incubation with the  
609 appropriate HRP-conjugated antibodies (Invitrogen). Bands were visualized using the luminol-based  
610 enhanced chemiluminescent kit (Clarity™ Western ECL Substrate, BioRad) and a Serva Purple total  
611 protein stain (SERVA Electrophoresis GmbH) was used for protein normalization. Blots were imaged  
612 using a Fusion FX (Vilber Lourmat) imaging system and band intensities were measured with the  
613 FusionCapt Advance and Bio1D software packages (Vilber Lourmat) for semi-quantitative analysis.

614

## 615 **Live cell imaging**

616 For live cell imaging, mouse NPCs and Neuro-2a cells (8000 cells/well) were seeded in 96-well plates  
617 and placed in an IncuCyte ZOOM (Essen Bioscience) immediately after subculturing. Phase-contrast  
618 images were captured with a 10x (Neuro-2a) or 20x (NPCs) objective, every 2 h for a total of 72 h to  
619 96 h. Per well, two images were captured for every time point and per experimental condition 4-6  
620 wells were used as technical replicates. All live cell imaging experiments were replicated  
621 independently.

622

## 623 **Statistical analysis**

624 Statistical analysis was performed using GraphPad Prism 7.02. Comparisons between control and  
625 irradiated C57BL/6 mice were performed using unpaired two-tailed Student's *t*-test. Comparisons  
626 between control and irradiated WT and cKO mice were performed using one-way ANOVA. A *p*-value  
627 of  $< 0.05$  was considered statistically significant. More details about statistical tests and numbers of  
628 replicates are indicated in figure legends.

629

630 **References**

- 631 1 Kasthuber, E. R. & Lowe, S. W. Putting p53 in Context. *Cell* **170**, 1062-1078,  
632 doi:10.1016/j.cell.2017.08.028 (2017).
- 633 2 Brady, C. A. & Attardi, L. D. p53 at a glance. *J Cell Sci* **123**, 2527-2532, doi:10.1242/jcs.064501  
634 (2010).
- 635 3 Lane, D. P. Cancer. p53, guardian of the genome. *Nature* **358**, 15-16, doi:10.1038/358015a0  
636 (1992).
- 637 4 Aylon, Y. & Oren, M. The Paradox of p53: What, How, and Why? *Cold Spring Harb Perspect*  
638 *Med* **6**, doi:10.1101/cshperspect.a026328 (2016).
- 639 5 Bowen, M. E. & Attardi, L. D. The role of p53 in developmental syndromes. *J Mol Cell Biol* **11**,  
640 200-211, doi:10.1093/jmcb/mjy087 (2019).
- 641 6 Kaiser, A. M. & Attardi, L. D. Deconstructing networks of p53-mediated tumor suppression in  
642 vivo. *Cell Death Differ* **25**, 93-103, doi:10.1038/cdd.2017.171 (2018).
- 643 7 Bianchi, F. T. *et al.* Citron Kinase Deficiency Leads to Chromosomal Instability and TP53-  
644 Sensitive Microcephaly. *Cell Reports* **18**, 1674-1686, doi:10.1016/j.celrep.2017.01.054 (2017).
- 645 8 Insolera, R., Bazzi, H., Shao, W., Anderson, K. V. & Shi, S. H. Cortical neurogenesis in the  
646 absence of centrioles. *Nat Neurosci* **17**, 1528-1535, doi:10.1038/nn.3831 (2014).
- 647 9 Mao, H. Q., McMahon, J. J., Tsai, Y. H., Wang, Z. F. & Silver, D. L. Haploinsufficiency for Core  
648 Exon Junction Complex Components Disrupts Embryonic Neurogenesis and Causes p53-  
649 Mediated Microcephaly. *Plos Genet* **12**, doi:10.1371/journal.pgen.1006282 (2016).
- 650 10 Marjanovic, M. *et al.* CEP63 deficiency promotes p53-dependent microcephaly and reveals a  
651 role for the centrosome in meiotic recombination. *Nat Commun* **6**, 7676,  
652 doi:10.1038/ncomms8676 (2015).
- 653 11 Marthiens, V. *et al.* Centrosome amplification causes microcephaly. *Nature Cell Biology* **15**,  
654 731+, doi:10.1038/ncb2746 (2013).
- 655 12 Pao, G. M. *et al.* Role of BRCA1 in brain development. *Proc Natl Acad Sci U S A* **111**, E1240-  
656 1248, doi:10.1073/pnas.1400783111 (2014).
- 657 13 Pollock, A., Bian, S., Zhang, C., Chen, Z. & Sun, T. Growth of the developing cerebral cortex is  
658 controlled by microRNA-7 through the p53 pathway. *Cell Rep* **7**, 1184-1196,  
659 doi:10.1016/j.celrep.2014.04.003 (2014).
- 660 14 Shi, L., Qalieh, A., Lam, M. M., Keil, J. M. & Kwan, K. Y. Robust elimination of genome-  
661 damaged cells safeguards against brain somatic aneuploidy following Knl1 deletion. *Nat*  
662 *Commun* **10**, 2588, doi:10.1038/s41467-019-10411-w (2019).
- 663 15 Rasmussen, S. A., Jamieson, D. J., Honein, M. A. & Petersen, L. R. Zika Virus and Birth Defects-  
664 -Reviewing the Evidence for Causality. *N Engl J Med* **374**, 1981-1987,  
665 doi:10.1056/NEJMSr1604338 (2016).
- 666 16 Otake, M. & Schull, W. J. Radiation-related brain damage and growth retardation among the  
667 prenatally exposed atomic bomb survivors. *Int J Radiat Biol* **74**, 159-171 (1998).
- 668 17 Verreet, T., Verslegers, M., Quintens, R., Baatout, S. & Benotmane, M. A. Current Evidence  
669 for Developmental, Structural, and Functional Brain Defects following Prenatal Radiation  
670 Exposure. *Neural Plast* **2016**, 1243527, doi:10.1155/2016/1243527 (2016).
- 671 18 Lancaster, M. A. & Knoblich, J. A. Spindle orientation in mammalian cerebral cortical  
672 development. *Curr Opin Neurobiol* **22**, 737-746, doi:10.1016/j.conb.2012.04.003 (2012).
- 673 19 Saade, M., Blanco-Ameijeiras, J., Gonzalez-Gobartt, E. & Marti, E. A centrosomal view of CNS  
674 growth. *Development* **145**, doi:10.1242/dev.170613 (2018).
- 675 20 McKinnon, P. J. Maintaining genome stability in the nervous system. *Nat Neurosci* **16**, 1523-  
676 1529, doi:10.1038/nn.3537 (2013).
- 677 21 McKinnon, P. J. Genome integrity and disease prevention in the nervous system. *Genes Dev*  
678 **31**, 1180-1194, doi:10.1101/gad.301325.117 (2017).

- 679 22 Singh, S. & Solecki, D. J. Polarity transitions during neurogenesis and germinal zone exit in the  
680 developing central nervous system. *Front Cell Neurosci* **9**, 62, doi:10.3389/fncel.2015.00062  
681 (2015).
- 682 23 Lamouille, S., Xu, J. & Derynck, R. Molecular mechanisms of epithelial-mesenchymal  
683 transition. *Nat Rev Mol Cell Biol* **15**, 178-196, doi:10.1038/nrm3758 (2014).
- 684 24 Halliday, J. *et al.* In vivo radiation response of proneural glioma characterized by protective  
685 p53 transcriptional program and proneural-mesenchymal shift. *Proc Natl Acad Sci U S A* **111**,  
686 5248-5253, doi:10.1073/pnas.1321014111 (2014).
- 687 25 Mao, P. *et al.* Mesenchymal glioma stem cells are maintained by activated glycolytic  
688 metabolism involving aldehyde dehydrogenase 1A3. *Proc Natl Acad Sci U S A* **110**, 8644-8649,  
689 doi:10.1073/pnas.1221478110 (2013).
- 690 26 Verreet, T. *et al.* Persistent Impact of In utero Irradiation on Mouse Brain Structure and  
691 Function Characterized by MR Imaging and Behavioral Analysis. *Front Behav Neurosci* **10**, 83,  
692 doi:10.3389/fnbeh.2016.00083 (2016).
- 693 27 Takahashi, T., Nowakowski, R. S. & Caviness, V. S., Jr. The cell cycle of the pseudostratified  
694 ventricular epithelium of the embryonic murine cerebral wall. *J Neurosci* **15**, 6046-6057  
695 (1995).
- 696 28 Roque, T. *et al.* Lack of a p21waf1/cip -dependent G1/S checkpoint in neural stem and  
697 progenitor cells after DNA damage in vivo. *Stem Cells* **30**, 537-547, doi:10.1002/stem.1010  
698 (2012).
- 699 29 Verreet, T. *et al.* A multidisciplinary approach unravels early and persistent effects of X-ray  
700 exposure at the onset of prenatal neurogenesis. *J Neurodev Disord* **7**, 3, doi:10.1186/1866-  
701 1955-7-3 (2015).
- 702 30 Kwan, K. Y., Sestan, N. & Anton, E. S. Transcriptional co-regulation of neuronal migration and  
703 laminar identity in the neocortex. *Development* **139**, 1535-1546, doi:10.1242/dev.069963  
704 (2012).
- 705 31 Quintens, R. *et al.* Identification of novel radiation-induced p53-dependent transcripts  
706 extensively regulated during mouse brain development. *Biol Open* **4**, 331-344,  
707 doi:10.1242/bio.20149969 (2015).
- 708 32 Lee, Y. S. *et al.* Neurogenesis requires TopBP1 to prevent catastrophic replicative DNA  
709 damage in early progenitors. *Nature Neuroscience* **15**, 819-U833, doi:10.1038/nn.3097  
710 (2012).
- 711 33 Chang, T. C. *et al.* Transactivation of miR-34a by p53 broadly influences gene expression and  
712 promotes apoptosis. *Mol Cell* **26**, 745-752, doi:10.1016/j.molcel.2007.05.010 (2007).
- 713 34 Raver-Shapira, N. *et al.* Transcriptional activation of miR-34a contributes to p53-mediated  
714 apoptosis. *Mol Cell* **26**, 731-743, doi:10.1016/j.molcel.2007.05.017 (2007).
- 715 35 Subramanian, A. *et al.* Gene set enrichment analysis: A knowledge-based approach for  
716 interpreting genome-wide expression profiles. *P Natl Acad Sci USA* **102**, 15545-15550,  
717 doi:10.1073/pnas.0506580102 (2005).
- 718 36 Xie, Y., Juschke, C., Esk, C., Hirotsune, S. & Knoblich, J. A. The phosphatase PP4c controls  
719 spindle orientation to maintain proliferative symmetric divisions in the developing neocortex.  
720 *Neuron* **79**, 254-265, doi:10.1016/j.neuron.2013.05.027 (2013).
- 721 37 Eom, H. S. *et al.* Ionizing radiation induces neuronal differentiation of Neuro-2a cells via PI3-  
722 kinase and p53-dependent pathways. *Int J Radiat Biol* **91**, 585-595,  
723 doi:10.3109/09553002.2015.1029595 (2015).
- 724 38 Eom, H. S. *et al.* Ionizing Radiation Induces Altered Neuronal Differentiation by mGluR1  
725 through PI3K-STAT3 Signaling in C17.2 Mouse Neural Stem-Like Cells. *Plos One* **11**, e0147538,  
726 doi:10.1371/journal.pone.0147538 (2016).
- 727 39 Silver, D. L. *et al.* The exon junction complex component Magoh controls brain size by  
728 regulating neural stem cell division. *Nature Neuroscience* **13**, 551-U553, doi:10.1038/nn.2527  
729 (2010).

- 730 40 Pilaz, L. J. *et al.* Prolonged Mitosis of Neural Progenitors Alters Cell Fate in the Developing  
731 Brain. *Neuron* **89**, 83-99, doi:10.1016/j.neuron.2015.12.007 (2016).
- 732 41 Ter Huurne, M. *et al.* Critical Role for P53 in Regulating the Cell Cycle of Ground State  
733 Embryonic Stem Cells. *Stem Cell Reports* **14**, 175-183, doi:10.1016/j.stemcr.2020.01.001  
734 (2020).
- 735 42 Martoriati, A. *et al.* *dapk1*, encoding an activator of a p19ARF-p53-mediated apoptotic  
736 checkpoint, is a transcription target of p53. *Oncogene* **24**, 1461-1466,  
737 doi:10.1038/sj.onc.1208256 (2005).
- 738 43 Zhang, C. L., Zou, Y., He, W., Gage, F. H. & Evans, R. M. A role for adult TLX-positive neural  
739 stem cells in learning and behaviour. *Nature* **451**, 1004-1007, doi:10.1038/nature06562  
740 (2008).
- 741 44 Niu, W., Zou, Y., Shen, C. & Zhang, C. L. Activation of postnatal neural stem cells requires  
742 nuclear receptor TLX. *J Neurosci* **31**, 13816-13828, doi:10.1523/JNEUROSCI.1038-11.2011  
743 (2011).
- 744 45 Bowen, M. E. *et al.* The Spatiotemporal Pattern and Intensity of p53 Activation Dictates  
745 Phenotypic Diversity in p53-Driven Developmental Syndromes. *Dev Cell* **50**, 212-228 e216,  
746 doi:10.1016/j.devcel.2019.05.015 (2019).
- 747 46 Itoh, Y. *et al.* Scratch regulates neuronal migration onset via an epithelial-mesenchymal  
748 transition-like mechanism. *Nat Neurosci* **16**, 416-425, doi:10.1038/nn.3336 (2013).
- 749 47 Kon, E., Cossard, A. & Jossin, Y. Neuronal Polarity in the Embryonic Mammalian Cerebral  
750 Cortex. *Front Cell Neurosci* **11**, 163, doi:10.3389/fncel.2017.00163 (2017).
- 751 48 Yoon, K. J. *et al.* Zika-Virus-Encoded NS2A Disrupts Mammalian Cortical Neurogenesis by  
752 Degrading Adherens Junction Proteins. *Cell Stem Cell* **21**, 349-358 e346,  
753 doi:10.1016/j.stem.2017.07.014 (2017).
- 754 49 Fedele, M., Cerchia, L., Pegoraro, S., Sgarra, R. & Manfioletti, G. Proneural-Mesenchymal  
755 Transition: Phenotypic Plasticity to Acquire Multitherapy Resistance in Glioblastoma. *Int J*  
756 *Mol Sci* **20**, doi:10.3390/ijms20112746 (2019).
- 757 50 Hoeck, J. D. *et al.* *Fbw7* controls neural stem cell differentiation and progenitor apoptosis via  
758 Notch and c-Jun. *Nat Neurosci* **13**, 1365-1372, doi:10.1038/nn.2644 (2010).
- 759 51 Zhou, W. *et al.* BLOS2 negatively regulates Notch signaling during neural and hematopoietic  
760 stem and progenitor cell development. *Elife* **5**, doi:10.7554/eLife.18108 (2016).
- 761 52 Fei, J. F., Haffner, C. & Huttner, W. B. 3' UTR-dependent, miR-92-mediated restriction of Tis21  
762 expression maintains asymmetric neural stem cell division to ensure proper neocortex size.  
763 *Cell Rep* **7**, 398-411, doi:10.1016/j.celrep.2014.03.033 (2014).
- 764 53 Crespi, A. *et al.* LIN7 regulates the filopodium- and neurite-promoting activity of IRSp53. *J Cell*  
765 *Sci* **125**, 4543-4554, doi:10.1242/jcs.106484 (2012).
- 766 54 Gilbert, J. & Man, H. Y. The X-Linked Autism Protein KIAA2022/KIDLIA Regulates Neurite  
767 Outgrowth via N-Cadherin and delta-Catenin Signaling. *eNeuro* **3**, doi:10.1523/ENEURO.0238-  
768 16.2016 (2016).
- 769 55 Amadei, G. *et al.* A Smaug2-Based Translational Repression Complex Determines the Balance  
770 between Precursor Maintenance versus Differentiation during Mammalian Neurogenesis. *J*  
771 *Neurosci* **35**, 15666-15681, doi:10.1523/JNEUROSCI.2172-15.2015 (2015).
- 772 56 Pollen, A. A. *et al.* Molecular identity of human outer radial glia during cortical development.  
773 *Cell* **163**, 55-67, doi:10.1016/j.cell.2015.09.004 (2015).
- 774 57 Konirova, J. *et al.* Differentiation Induction as a Response to Irradiation in Neural Stem Cells  
775 In Vitro. *Cancers (Basel)* **11**, doi:10.3390/cancers11070913 (2019).
- 776 58 Licursi, V. *et al.* X-ray irradiated cultures of mouse cortical neural stem/progenitor cells  
777 recover cell viability and proliferation with dose-dependent kinetics. *Sci Rep* **10**, 6562,  
778 doi:10.1038/s41598-020-63348-2 (2020).
- 779 59 Barazzuol, L., Ju, L. & Jeggo, P. A. A coordinated DNA damage response promotes adult  
780 quiescent neural stem cell activation. *PLoS Biol* **15**, e2001264,  
781 doi:10.1371/journal.pbio.2001264 (2017).



- 782 60 Kracikova, M., Akiri, G., George, A., Sachidanandam, R. & Aaronson, S. A. A threshold  
783 mechanism mediates p53 cell fate decision between growth arrest and apoptosis. *Cell Death*  
784 *Differ* **20**, 576-588, doi:10.1038/cdd.2012.155 (2013).
- 785 61 Purvis, J. E. *et al.* p53 dynamics control cell fate. *Science* **336**, 1440-1444,  
786 doi:10.1126/science.1218351 (2012).
- 787 62 Meek, D. W. & Anderson, C. W. Posttranslational modification of p53: cooperative  
788 integrators of function. *Cold Spring Harb Perspect Biol* **1**, a000950,  
789 doi:10.1101/cshperspect.a000950 (2009).
- 790 63 Wang, D. *et al.* Acetylation-regulated interaction between p53 and SET reveals a widespread  
791 regulatory mode. *Nature* **538**, 118-122, doi:10.1038/nature19759 (2016).
- 792 64 Joruz, S. M. & Bourdon, J. C. p53 Isoforms: Key Regulators of the Cell Fate Decision. *Cold*  
793 *Spring Harb Perspect Med* **6**, doi:10.1101/cshperspect.a026039 (2016).
- 794 65 Armstrong, J. F., Kaufman, M. H., Harrison, D. J. & Clarke, A. R. High-frequency  
795 developmental abnormalities in p53-deficient mice. *Curr Biol* **5**, 931-936 (1995).
- 796 66 Sah, V. P. *et al.* A subset of p53-deficient embryos exhibit exencephaly. *Nat Genet* **10**, 175-  
797 180, doi:10.1038/ng0695-175 (1995).
- 798 67 Mendrysa, S. M., Ghassemifar, S. & Malek, R. p53 in the CNS: Perspectives on Development,  
799 Stem Cells, and Cancer. *Genes Cancer* **2**, 431-442, doi:10.1177/1947601911409736 (2011).
- 800 68 Ambrosini, A. *et al.* Apoptotic forces in tissue morphogenesis. *Mech Dev* **144**, 33-42,  
801 doi:10.1016/j.mod.2016.10.001 (2017).
- 802 69 Gimple, R. C., Bhargava, S., Dixit, D. & Rich, J. N. Glioblastoma stem cells: lessons from the  
803 tumor hierarchy in a lethal cancer. *Genes Dev* **33**, 591-609, doi:10.1101/gad.324301.119  
804 (2019).
- 805 70 Bhaduri, A. *et al.* Outer Radial Glia-like Cancer Stem Cells Contribute to Heterogeneity of  
806 Glioblastoma. *Cell Stem Cell* **26**, 48-63 e46, doi:10.1016/j.stem.2019.11.015 (2020).
- 807 71 Wang, R. *et al.* Adult Human Glioblastomas Harbor Radial Glia-like Cells. *Stem Cell Reports* **14**,  
808 338-350, doi:10.1016/j.stemcr.2020.01.007 (2020).
- 809 72 Martynoga, B., Morrison, H., Price, D. J. & Mason, J. O. Foxg1 is required for specification of  
810 ventral telencephalon and region-specific regulation of dorsal telencephalic precursor  
811 proliferation and apoptosis. *Dev Biol* **283**, 113-127, doi:10.1016/j.ydbio.2005.04.005 (2005).
- 812 73 Kim, D., Langmead, B. & Salzberg, S. L. HISAT: a fast spliced aligner with low memory  
813 requirements. *Nat Methods* **12**, 357-360, doi:10.1038/nmeth.3317 (2015).
- 814 74 Anders, S., Pyl, P. T. & Huber, W. HTSeq--a Python framework to work with high-throughput  
815 sequencing data. *Bioinformatics* **31**, 166-169, doi:10.1093/bioinformatics/btu638 (2015).
- 816 75 Lee, K. H. *et al.* A genomewide study identifies the Wnt signaling pathway as a major target  
817 of p53 in murine embryonic stem cells. *Proc Natl Acad Sci U S A* **107**, 69-74,  
818 doi:10.1073/pnas.0909734107 (2010).
- 819 76 Chen, E. Y. *et al.* Enrichr: interactive and collaborative HTML5 gene list enrichment analysis  
820 tool. *BMC Bioinformatics* **14**, 128, doi:10.1186/1471-2105-14-128 (2013).
- 821 77 Kuleshov, M. V. *et al.* Enrichr: a comprehensive gene set enrichment analysis web server  
822 2016 update. *Nucleic Acids Res* **44**, W90-97, doi:10.1093/nar/gkw377 (2016).
- 823 78 Shannon, P. *et al.* Cytoscape: a software environment for integrated models of biomolecular  
824 interaction networks. *Genome Res* **13**, 2498-2504, doi:10.1101/gr.1239303 (2003).
- 825 79 Pfaffl, M. W. A new mathematical model for relative quantification in real-time RT-PCR.  
826 *Nucleic Acids Res* **29**, e45, doi:10.1093/nar/29.9.e45 (2001).
- 827 80 Benjamini, Y., Krieger, A. M. & Yekutieli, D. Adaptive linear step-up procedures that control  
828 the false discovery rate. *Biometrika* **93**, 491-507, doi:DOI 10.1093/biomet/93.3.491 (2006).

829

830



831 **Acknowledgements**

832 The authors wish to thank Ann Janssen, Amelie Coolkens, Annick Francis, Mieke Neefs, Lisa Daenen,  
833 Brit Proesmans, and Bent Hubrecht for excellent technical assistance. This work was supported by  
834 the 7<sup>th</sup> European Framework Programme (CEREBRAD - GA: 295552 to M.A.B.), the Fonds  
835 Wetenschappelijk Onderzoek (G0A3116N to D.H. and R.Q.) and the Aspirant Wetenschappelijk  
836 Medewerker programme of the Belgian Nuclear Research Centre (to A.C.M.M., M.V., and T.V.).

837

838 **Author contributions**

839 R.Q., M.A.B., D.H., L.M. conceived the study. A.C.M.M., R.Q., M.V., T.V., H.B.F. designed and  
840 performed the experiments. R.Q., A.C.M.M., M.V., M.M., W.F.J.V.I., T.V., H.B.F. analyzed the data.  
841 W.H.D.V. developed software. D.H., R.Q., M.A.B., S.B. acquired funding. R.Q. wrote the draft  
842 manuscript. A.C.M.M., M.V., T.V., M.M., W.F.J.V.I., W.H.D.V., L.M., M.A.B., D.H. reviewed and edited  
843 the manuscript.

844

845 **Competing interests**

846 The authors declare no competing interests.

847

848

## 849 Figure Legends

850 **Figure 1** Reduced brain size and induction of DNA damage, cell cycle arrest and apoptosis in  
851 prenatally irradiated mice. (a-c) Body weight, brain weight and brain-to-body weight of postnatal day  
852 10 mice after irradiation at E11. BrW: brain weight, BoW: body weight.  $n = 18-27$ .  $*P < 0.05$ ,  $**P <$   
853  $0.01$ ,  $***P < 0.001$  (Student's  $t$ -test). (d, e) DNA damage was analyzed via staining for the DNA  
854 double strand break marker 53BP1. IR: Ionizing radiation.  $n = 3-8$ ;  $***P < 0.001$  (Student's  $t$ -test);  
855 scale bar:  $20\ \mu\text{m}$ . (f-i) Staining for the late G2/mitosis marker phospho-histone 3 (PH3) and the S-  
856 phase marker BrdU indicated a transient G2/M arrest after irradiation. (f) Shows staining at 2 h post-  
857 irradiation. PI: post-irradiation.  $n = 6$ ;  $*P < 0.05$ ,  $**P < 0.01$ ,  $***P < 0.001$  (basal mitoses);  $###P < 0.001$   
858 (apical mitoses) (Student's  $t$ -test); scale bar:  $20\ \mu\text{m}$ . (j, k) Immunostaining for the apoptosis marker  
859 TUNEL indicated a strong induction of apoptosis at 6 h after irradiation. Note non-specific staining of  
860 blood vessels lining the basal membrane.  $n = 5-6$ ;  $**P < 0.01$  (Student's  $t$ -test); scale bar:  $20\ \mu\text{m}$ . (l,  
861 m) Immunostaining for the apoptosis marker cleaved caspase-3 indicated a strong induction of  
862 apoptosis at 24 h after irradiation.  $n = 6$ ;  $***P < 0.001$  (Student's  $t$ -test). (n-p) Immunostainings of  
863 brains at post-natal day 2 for the neocortical layer markers Tbr1 (L6), Ctjp2 (L5) and Satb2 (L2-4)  
864 indicated a 30% reduction in the number of Tbr1+ L6 neurons.  $n = 4-6$ ;  $**P < 0.01$  (Student's  $t$ -test);  
865 scale bar:  $100\ \mu\text{m}$ . In all panels data represent mean  $\pm$  S.D.

866 **Figure 2:** Knockout of *Trp53* in neural progenitors of the dorsal forebrain partially rescues brain size  
867 reduction after irradiation at embryonic day (E) 11. (a) Conditional *Trp53* knockout mice (cKO) were  
868 generated by crossing *Emx1-Cre* mice with *Trp53<sup>fl/fl</sup>* mice. (b) Staining for phosphorylated p53 (p53-P)  
869 in E11 brain at 2 h after irradiation indicates loss of p53 expression primarily in the dorsomedial  
870 pallium. Inset shows differences in p53-P staining intensity in individual cells. Please note aspecific  
871 signal in the cKO. (c) Representative images of haematoxylin and eosin-stained coronal sections of P1  
872 mice of the indicated conditions after irradiation at E11. Relative brain size is indicated in red. (d)  
873 Representative images of dissected brains of P1 mice of the indicated conditions after irradiation at  
874 E11. Relative cerebral cortical surface is indicated in red. (e, f) Quantification of the relative cerebral  
875 cortical surface of P1 mice irradiated at E11 (e) and E14 (f). Two hemispheres per animal were  
876 averaged;  $n = 12-27$  animals per condition for E11 and  $n = 15-20$  animals per condition for E14.  $***P$   
877  $< 0.001$ ;  $****P < 0.0001$  (One-way ANOVA with correction for multiple testing according to <sup>80</sup>). (g, h)  
878 Induction of DNA damage and its initial repair are p53-independent. DNA damage was analyzed via  
879 staining for the DNA double strand break marker 53BP1.  $n = 6$ ,  $**P < 0.01$ ,  $****P < 0.0001$  (One-way  
880 ANOVA with correction for multiple testing according to <sup>80</sup>); scale bar:  $100\ \mu\text{m}$ . (i-k) DNA damage-  
881 induced cell cycle arrest is attenuated in cKO mice. Representative images of E11 cortices at 2 h after  
882 irradiation stained for the late G2/M phase marker phospho-histone 3 (PH3) (i). Quantification of  
883 basal and apical mitoses per unit area at 2 h (j) and 6 h (k) after irradiation.  $n = 6$ ;  $**P < 0.01$  (basal  
884 mitoses);  $\#P < 0.05$ ,  $###P < 0.01$  (apical mitoses) (One-way ANOVA with correction for multiple testing  
885 according to <sup>80</sup>). (l, m) Induction of apoptosis is markedly reduced at 6 h after irradiation in the  
886 dorsomedial pallium of cKO mice, demonstrating the role of p53 in the regulation of DNA damage-  
887 induced apoptosis.  $n = 6$ ,  $****P < 0.001$  (One-way ANOVA with correction for multiple testing  
888 according to <sup>80</sup>); scale bar:  $200\ \mu\text{m}$ . In all panels data represent mean  $\pm$  S.D.

889 **Figure 3:** Dynamic changes in gene expression are mediated by p53. (a) Volcano plots representing  
890 up- and -down-regulated genes after 2 h (left), 6 h (middle) and 12 h (right). Red dots indicate genes  
891 with  $P_{adj} < 0.05$ ; orange dots indicate genes with Fold Change  $> |2|$ ; green dots indicate genes with  
892  $P_{adj} < 0.05$  and Fold Change  $> |2|$ . (b) Gene network of upregulated genes in WT mice. The central  
893 node represents p53, edges indicate direct p53 targets based on Enrichr analysis. Biological processes  
894 are indicated by node colors. (c) Heatmap showing unsupervised hierarchical clustering of samples

895 based on expression levels of upregulated genes in WT mice. **(d)** Gene Set Enrichment Analysis  
896 (GSEA) for MSigDB Hallmark gene sets. Graphs depict FDR  $q$ -value versus the Nominal Enrichment  
897 Score (NES) based upon GSEA from RNA-Seq data (0 Gy versus 1 Gy). The dashed line represents the  
898 0.25 FDR cutoff. **(e)** Gene Ontology enrichment analysis was performed using the MSigDB “Investigate  
899 Gene Sets” tool. For computation of overlaps, GO Biological Processes were used as reference.

900 **Figure 4:** Radiation-induced DNA damage leads to premature neuronal differentiation and an  
901 increase in asymmetrically dividing radial glial cells (RGCs). **(a, b)** Reduction in the number of Pax6-  
902 positive RGCs at 6 h and 24 h after irradiation. **(c, d)** The number of Tbr2-positive intermediate  
903 progenitors was not changed after irradiation. **(e-g)** Ectopic appearance of Dcx-positive immature  
904 neurons in the ventricular zone at 6 h **(e, f)** and 24 h **(g)** after irradiation. **(h, i)** Increased number of  
905 Tbr1-positive post-mitotic pyramidal neurons at 6 h after irradiation.  $n = 5$  (1.0 Gy, 6 h),  $n = 6$  (all  
906 other conditions). **(j-k)** Immunostaining for the mitotic marker phospho-histone 3 (PH3) and the  
907 centrosomal protein  $\gamma$ -tubulin indicated an increase in the fraction of asymmetric divisions at 6 h  
908 post-irradiation. At least 150 PH3-positive cells were counted from 6 individual embryos per  
909 condition. All data represent mean + S.D. In all panels  $n = 6$  individual embryos per condition,  $*P <$   
910  $0.05$ ,  $**P < 0.01$ ,  $***P < 0.001$  (Student’s  $t$ -test). Scale bars: 20  $\mu\text{m}$ .

911 **Figure 5:** Ablation of *Trp53* prevents premature neuronal differentiation in irradiated fetuses. **(a-c)**  
912 Loss of Pax6 positive radial glia cells (RGCs) is rescued in cKO mice. Representative images of E11  
913 cortices at 6 h after irradiation stained for the RGC marker Pax6 **(a)**. Quantification of Pax6 positive  
914 cells per unit area at 6 h **(b)** and 24 h **(c)** after irradiation.  $n = 6$ ;  $**P < 0.01$ ,  $***P < 0.001$ ,  $****P <$   
915  $0.0001$  (One-way ANOVA with correction for multiple testing according to <sup>80</sup>). **(d, e)** Radiation-  
916 induced premature neurogenesis is absent in cKO mice. Representative images of E11 cortices at 6 h  
917 after irradiation stained for the immature neuronal marker Dcx **(d)**. Quantification of Dcx  
918 fluorescence intensity along the neocortex at 6 h after irradiation **(e)**.  $n = 6$  (WT\_0 Gy) or  $n = 5$  (all  
919 other conditions); scale bar: 100  $\mu\text{m}$ . **(f)** Graphical representation of the sequential EdU/BrdU  
920 administration paradigm. **(g)** Quantification of total cell cycle (Tc) and S-phase (Ts) duration, based on  
921 EdU and BrdU incorporation. In all panels data represent mean + S.D. Mouse image courtesy of  
922 DataBase Center for Life Science.

923 **Figure 6:** Radiation-induced DNA damage specifically regulates p53-dependent genes with possible  
924 functions in brain development and stem cell differentiation. **(a)** Venn diagram representing  
925 overlapping gene expression profiles between brains of E11 mouse fetuses at 2 h after irradiation  
926 and E10.5 *Magoh*<sup>+/-</sup> mice. *IR\_unique* genes are uniquely upregulated in irradiated mice, *Overlap*  
927 genes are upregulated both in irradiated and *Magoh*<sup>+/-</sup> mice, *Magoh\_unique* genes are uniquely  
928 upregulated in *Magoh*<sup>+/-</sup> mice. **(b)** Enrichment of predicted regulating transcription factors for  
929 *Overlap* genes. Numbers indicate PubMed IDs for the publications related to the respective gene  
930 sets. **(c)** Gene Ontology enrichment for *Overlap* genes was analyzed using the *Investigate Gene Sets*  
931 tool from the MSigDB. **(d)** Enrichment of predicted regulating transcription factors for *IR-unique*  
932 genes, performed as in **(b)**. **(e)** Gene Ontology enrichment for *IR\_unique* genes performed as in **(c)**. **(f)**  
933 Enrichment of predicted regulating transcription factors for *IR-unique* genes, performed as in **(b)**. **(g)**  
934 Gene Ontology enrichment for *IR\_unique* genes performed as in **(c)**. **(h)** Gene Set Enrichment Analysis  
935 (GSEA) of *IR\_unique*, *Magoh\_unique* and *Overlap* genes between mouse brains at E9 and E16.  
936 *IR\_unique* (FDR  $q < 0.001$ ) and *Overlap* genes (FDR  $q = 0.10$ ) are enriched in E16 brains compared to  
937 E9 brains. In contrast, *Magoh\_unique* genes (FDR  $q < 0.001$ ) are enriched in E9 brains. Microarray  
938 data from embryonic brain gene expression are from E-MTAB-2622 (ArrayExpress). **(i)** GSEA of  
939 *IR\_unique*, *Magoh\_unique* and *Overlap* genes in mouse R1E embryonic stem cells (ESCs) treated with  
940 the DNA damage inducing agent Adriamycin (Adr) which triggers their differentiation <sup>75</sup>. *IR\_unique*

941 (FDR  $q < 0.001$ ) and *Overlap* genes (FDR  $q < 0.001$ ) are enriched in Adr-treated ESCs, while  
942 *Magoh\_unique* genes (FDR  $q < 0.002$ ) are enriched in untreated ESCs. Microarray data from  
943 adriamycin-treated ESCs are from GSE26360 (Gene Expression Omnibus). (j-l) Gene expression  
944 changes of *IR\_unique*, *Magoh\_unique* and *Overlap* genes in case studies of *Mdm4* knockout neural  
945 stem cells (*Mdm4*-KO NSCs)<sup>42</sup>, *Tlx*-deficient NSCs (*Tlx*<sup>f/Z,CreER</sup> NSC + TM)<sup>43</sup>, and neural crest cells  
946 constitutively expressing moderate levels of p53 (*Trp53*<sup>25,26/+</sup> NCCs)<sup>45</sup>. Data represent mean  $\pm$  S.D. \* $P$   
947  $< 0.05$ , \*\*\*\* $P < 0.0001$  (One-way ANOVA with Tukey's correction for multiple comparisons).

948 **Figure 7:** Time-dependent induction of epithelial-to-mesenchymal transition (EMT)-related genes and  
949 induction of an EMT-like process after irradiation. (a) Gene expression of EMT-related genes. Data  
950 represent fold changes of mRNA expression relative to 0.0 Gy for every time point (normalized to  
951 mean of 1). Data represent mean + S.D. \* $P < 0.05$ ; \*\* $P < 0.01$ ; \*\*\* $P < 0.001$  (Student's *t*-test with  
952 correction for multiple comparisons according to<sup>80</sup>). (b) Western blotting at 6 h after irradiation for  
953 adherens junction (AJ) complex proteins (left) were normalised for total protein (right). (c) Semi-  
954 quantitative analysis of the intensities of the western blot results.  $n = 6$ ; \* $P < 0.05$ , \*\* $P < 0.01$   
955 (Student's *t*-test). (d) Representative images of immunostaining for the AJ complex proteins  $\beta$ -  
956 catenin and N-Cad at 6 h after irradiation. White arrowheads indicate breaks in the AJ belt. Yellow  
957 arrowheads indicate regions of apparent delamination.  $n = 5$ ; scale bars: 100  $\mu\text{m}$ , 10  $\mu\text{m}$ .

958

## 959 Supplemental figure legends

960 **Figure S1:** Specific ablation of phospho-p53 expression in the dorsal neocortex at E14. Pregnant mice  
961 were irradiated at E14 and embryos were dissected 2 h later for immunostaining for phospho-p53  
962 and TUJ1.

963 **Figure S2:** Radiation-induced changes in gene expression. (a, b) Venn-diagrams showing overlap in  
964 upregulated (b) and downregulated (c) genes in WT mice between the different time points. (c)  
965 Overlap between genes identified as upregulated after 2 h in WT mice by microarray and RNA-seq.  
966 RR: radiation-responsive. (d) Genes ranked according to their fold change in expression in irradiated  
967 versus control brain at 2 h after irradiation. (e) Time-dependent gene expression of the top 9 genes  
968 induced after 2 h. (f) Venn-diagram showing overlap in upregulated genes in cKO mice between the  
969 different time points. (g) Difference in fold change induction of p53 targets between WT and cKO  
970 mice at 2 h after irradiation.  $***P < 0.001$  (Paired Student's *t*-test). (h) qRT-PCR analysis of *Ano3*,  
971 *D630023F18Rik*, *Rnf169* and *Sec14l5* expression in WT and cKO cortices at 2 h after irradiation. (i)  
972 Trp53 mRNA expression in WT vs cKO mice after irradiation.  $n = 3$ ;  $*P < 0.05$ ,  $**P < 0.01$  (Paired  
973 Student's *t*-test).

974 **Figure S3:** Radiation-induced changes in expression of microRNAs. (a) Heatmap depicting the most  
975 significantly changed microRNAs, of which the p53 target miR-34a (b) was the most extensively  
976 upregulated.  $***P < 0.001$  (Student's *t*-test).

977 **Figure S4:** Gene Set Enrichment Analysis of gene expression profiles at 2 (a), 6 (b) and 12 h (c) post-  
978 irradiation. Selected gene sets are presented. The full lists can be found in Tables S2-S4.

979 **Figure S5:** Cell cycle length of neocortical radial glia is not altered at 24 h after irradiation. To  
980 calculate cell cycle length, mouse fetuses underwent a sequential EdU, BrdU administration  
981 paradigm (see methods). Based on stainings for Pax6 (blue), EdU (green) and BrdU (red) both the  
982 duration of the total cell cycle and that of the S-phase could be calculated (see methods and Fig. 5g).  
983  $n = 6$  (WT\_0 Gy) or  $n = 5$  (all other conditions); scale bars: 100  $\mu\text{m}$ .

984 **Figure S6:** Exposure to radiation induces differentiation of mouse neural progenitor cells (NPCs) and  
985 Neuro-2a cells in a p53-dependent manner. (a) Mouse NPCs were irradiated (IR) at day-in-vitro (DIV)  
986 2 and neurite outgrowth was analyzed via live cell imaging for two more days. (b) Neuro-2a cells at  
987 DIV 3 in growth medium (top), differentiation medium (middle) and growth medium after irradiation  
988 at DIV1 (bottom). Note the enlargement of the nuclei in differentiated cells and the multipolar  
989 neurite outgrowth in irradiated cells as compared to the uni-/bipolar cells in differentiation medium.  
990 (c) Neurite outgrowth analysis during live cell imaging of Neuro-2a cells shows enhanced neurite  
991 outgrowth in irradiated (IR) cells as compared to sham-irradiated cells which could be prevented by  
992 prior administration of the p53 inhibitor a-pifithrin (a-PFT). In all panels, data represent mean  $\pm$   
993 s.e.m. GM: proliferation medium; DM: differentiation medium.

994 **Figure S7:** Expression profiles of *IR\_unique*, *Overlap*, and *Magoh\_unique* gene sets in wild-type  
995 compared to TP53<sup>-/-</sup> (KO) ground state (2i) and serum-cultured (S) embryonic stem cells (data from  
996 <sup>41</sup>). (a-c) Heatmaps depicting gene expression profiles. (b-f) Principal component analysis indicates  
997 the variation explained by the respective gene sets. Please note that for *IR\_unique* and *Magoh\_unique*  
998 the cell culture conditions are in PC1 while for the *Overlap* genes PC1 represents the genotype. (g)  
999 RNA-seq counts of *IR\_unique*, *Overlap*, and *Magoh\_unique* genes. Data represent mean  $\pm$  S.D.  $*P <$   
1000 0.05,  $***P < 0.001$ ,  $****P < 0.0001$  (Two-way ANOVA).

1001 **Figure S8:** Disruption of the adherens junction (AJ) belt at the apical surface of the ventricular zone.  
1002 Representative images of immunostaining for the AJ complex proteins  $\beta$ -catenin and N-Cad at 6 h  
1003 after irradiation. White arrowheads indicate breaks in the AJ belt. Yellow arrowheads indicate  
1004 regions of apparent delamination. n = 5; scale bars: 100  $\mu$ m, 10  $\mu$ m.

1005 **Figure S9:** Irradiation of the embryonic mouse brain and proneural glioma activate a similar  
1006 transcriptional response. (a) The top 42 genes induced by radiation in glioma (taken from <sup>24</sup>) were  
1007 used to generate GSEA enrichment plots (upper panels) and volcano plots (lower panels) from  
1008 embryonic brains at 2 h (left), 6 h (middle) and 12 h (right) following irradiation. Green points  
1009 indicate genes with a FDR-corrected  $p$ -value  $<0.05$  and a Log2 fold change  $>1$ ; Red points indicate  
1010 genes with a FDR-corrected  $p$ -value  $<0.05$ ; Orange points indicate genes with a Log2 fold change  $>1$ .  
1011 For genes with a  $p$ -value = 0, the  $p$ -value was arbitrarily set at  $10^{E-20}$  to calculate the  $-\text{Log}_{10}(p\text{-value})$ .  
1012 (b) GSEA enrichment plots of proneural (left) and mesenchymal (right) gene signatures in embryonic  
1013 brains at 12 h following irradiation.

1014

1015



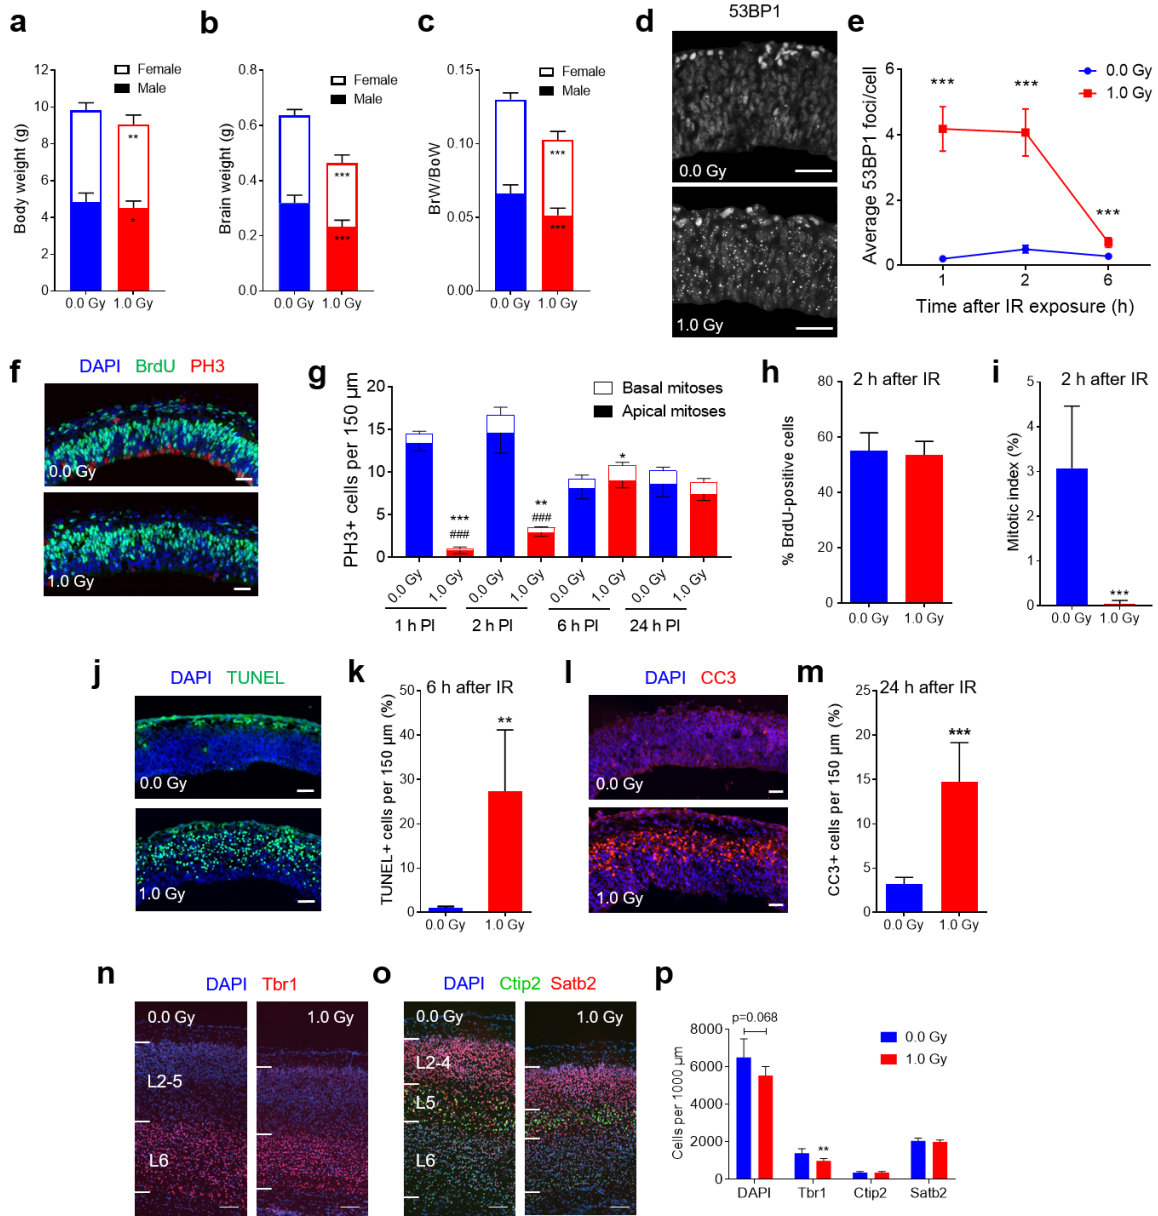

1016

1017

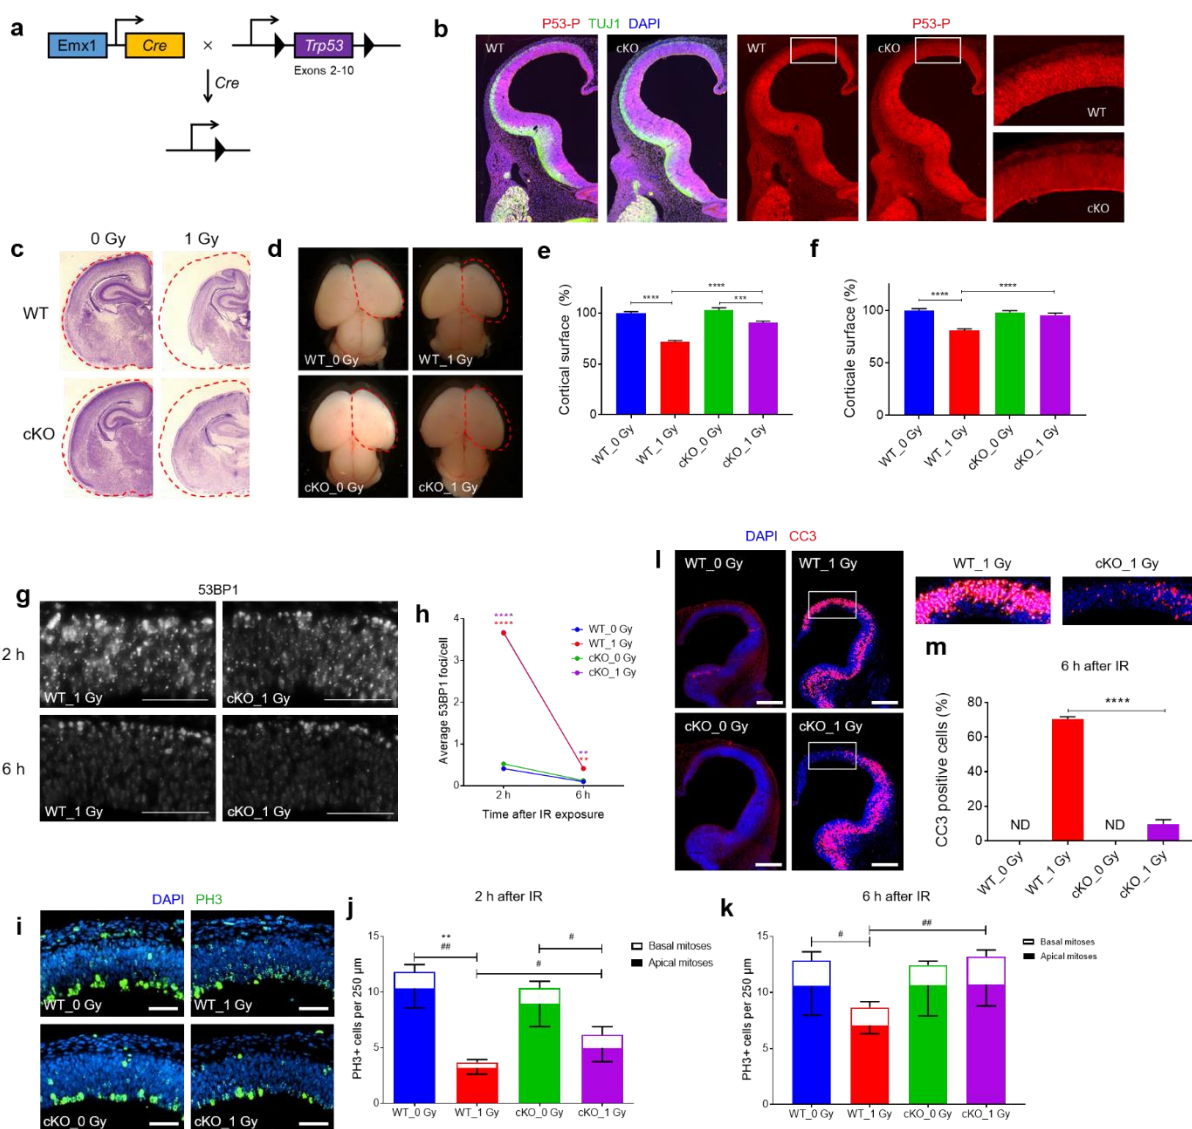

1018

1019

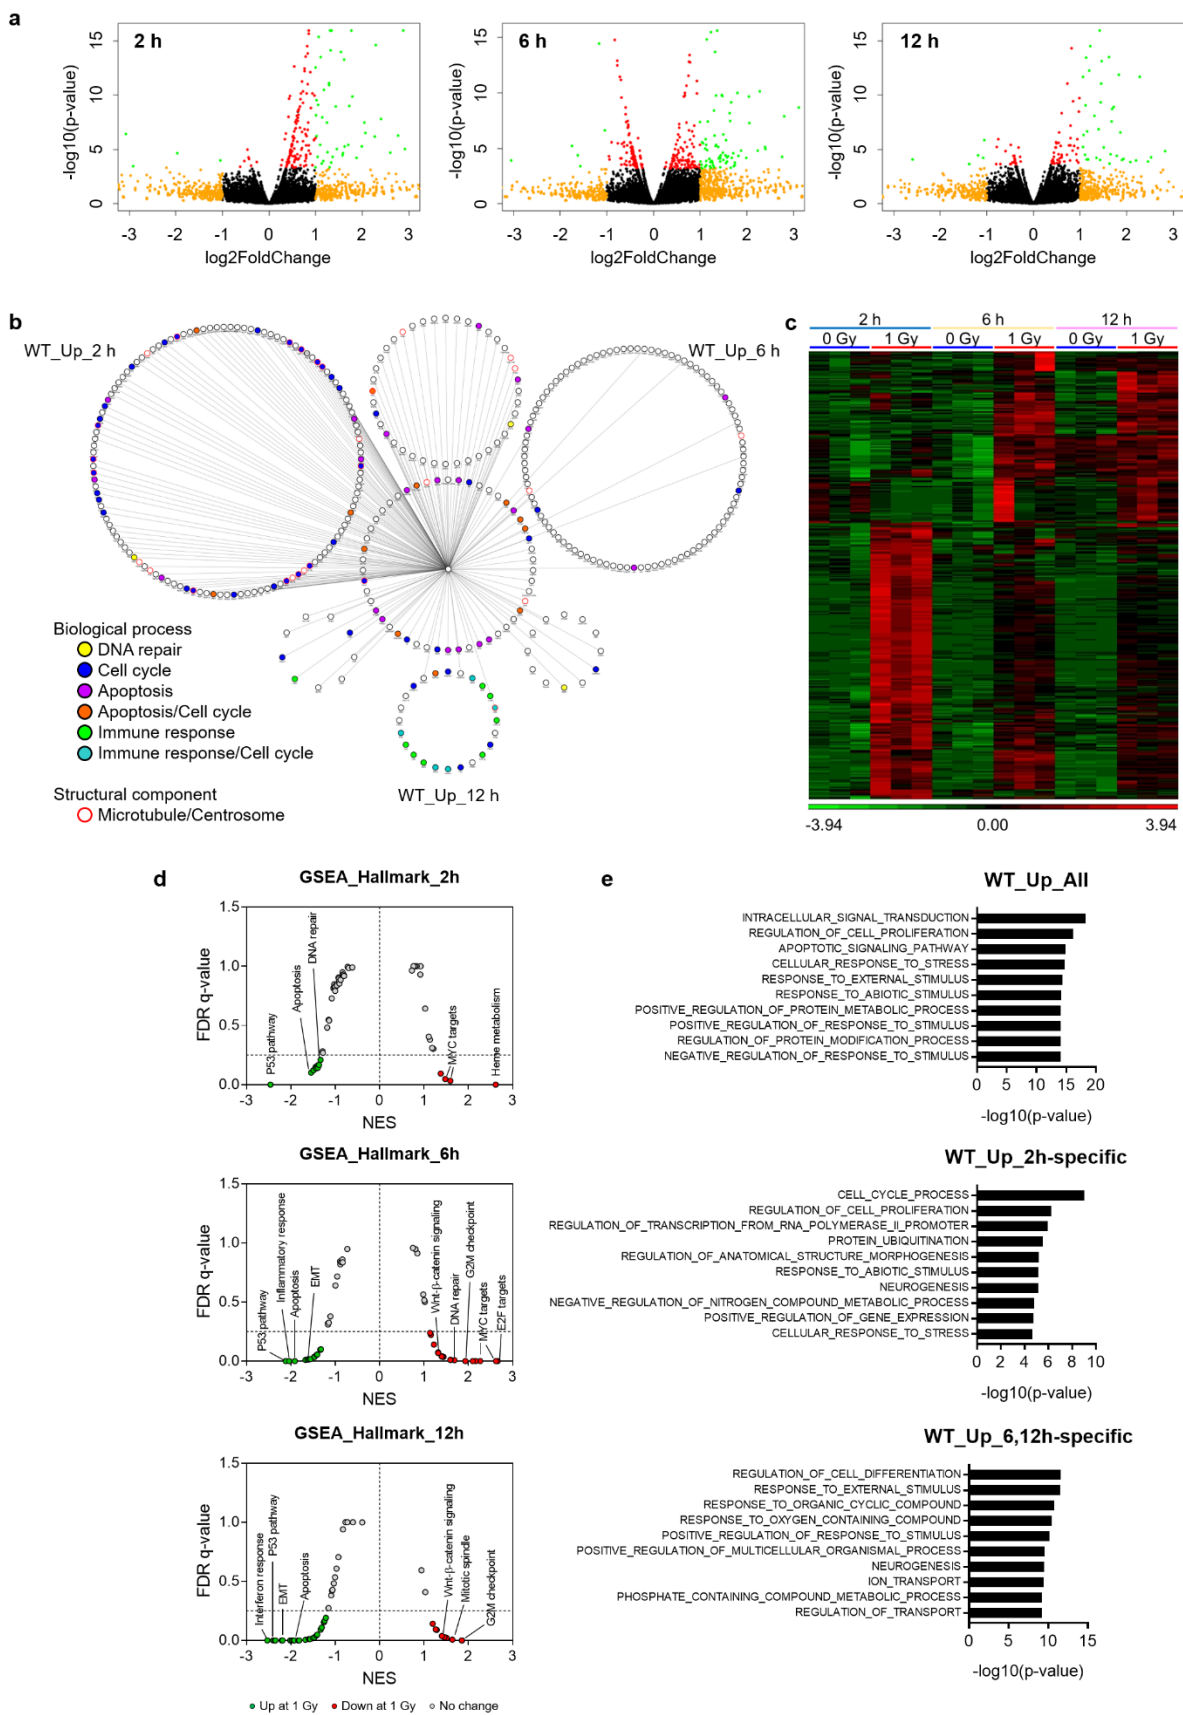

1020

1021

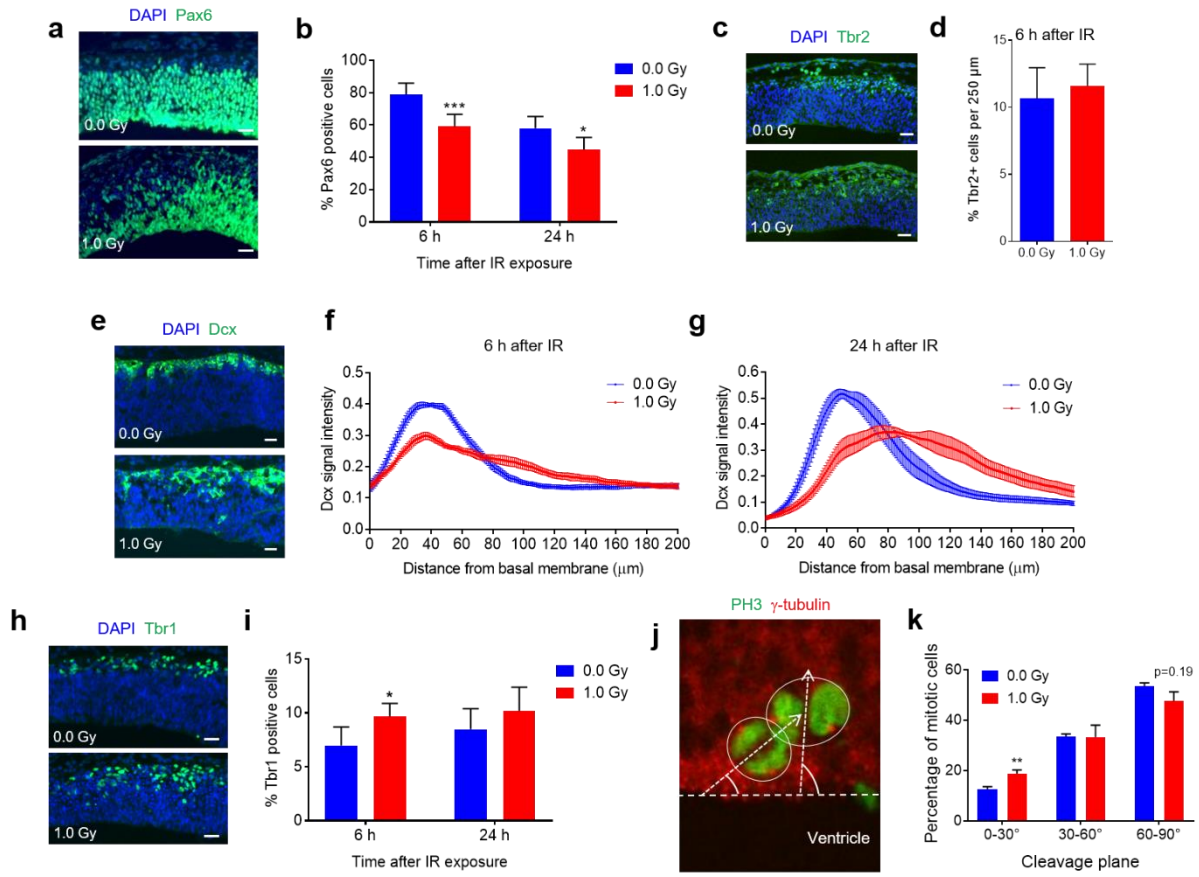

1022

1023

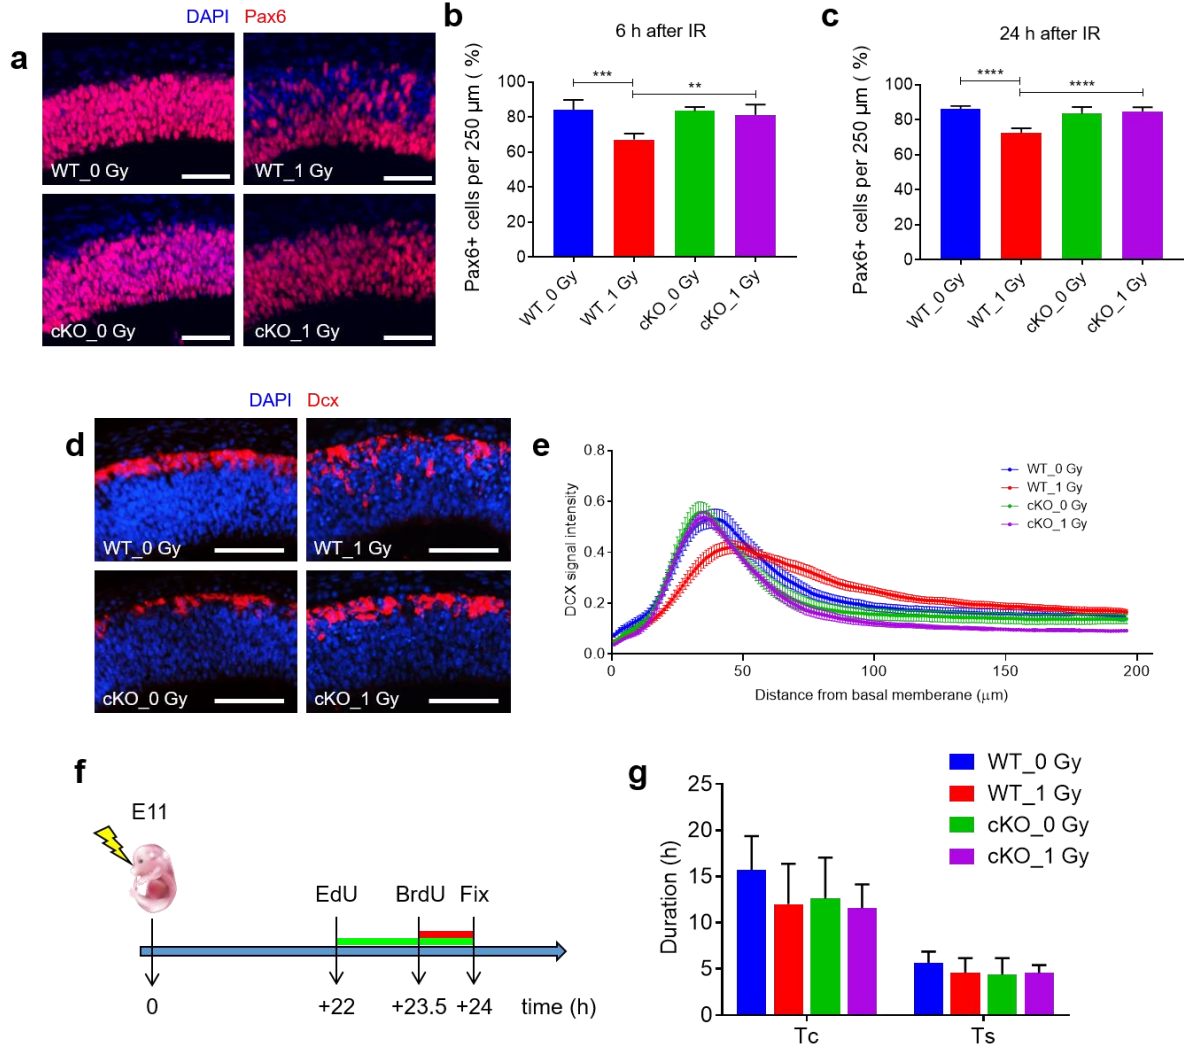

1024

1025

1026



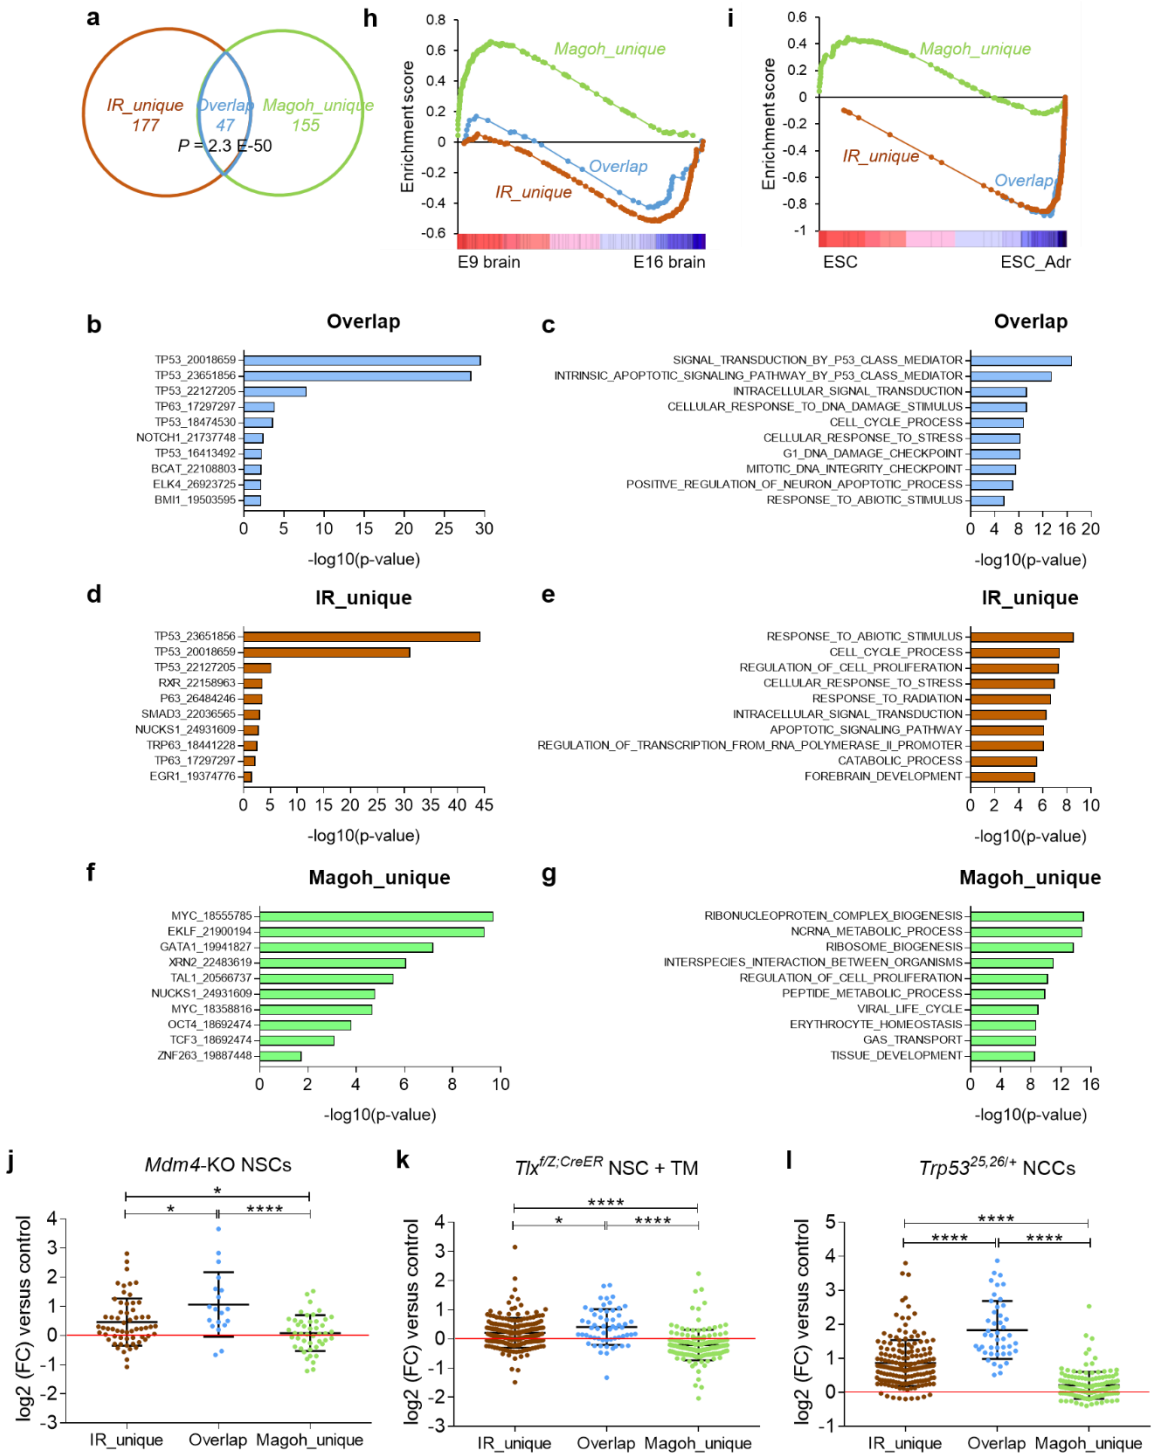

1027

1028



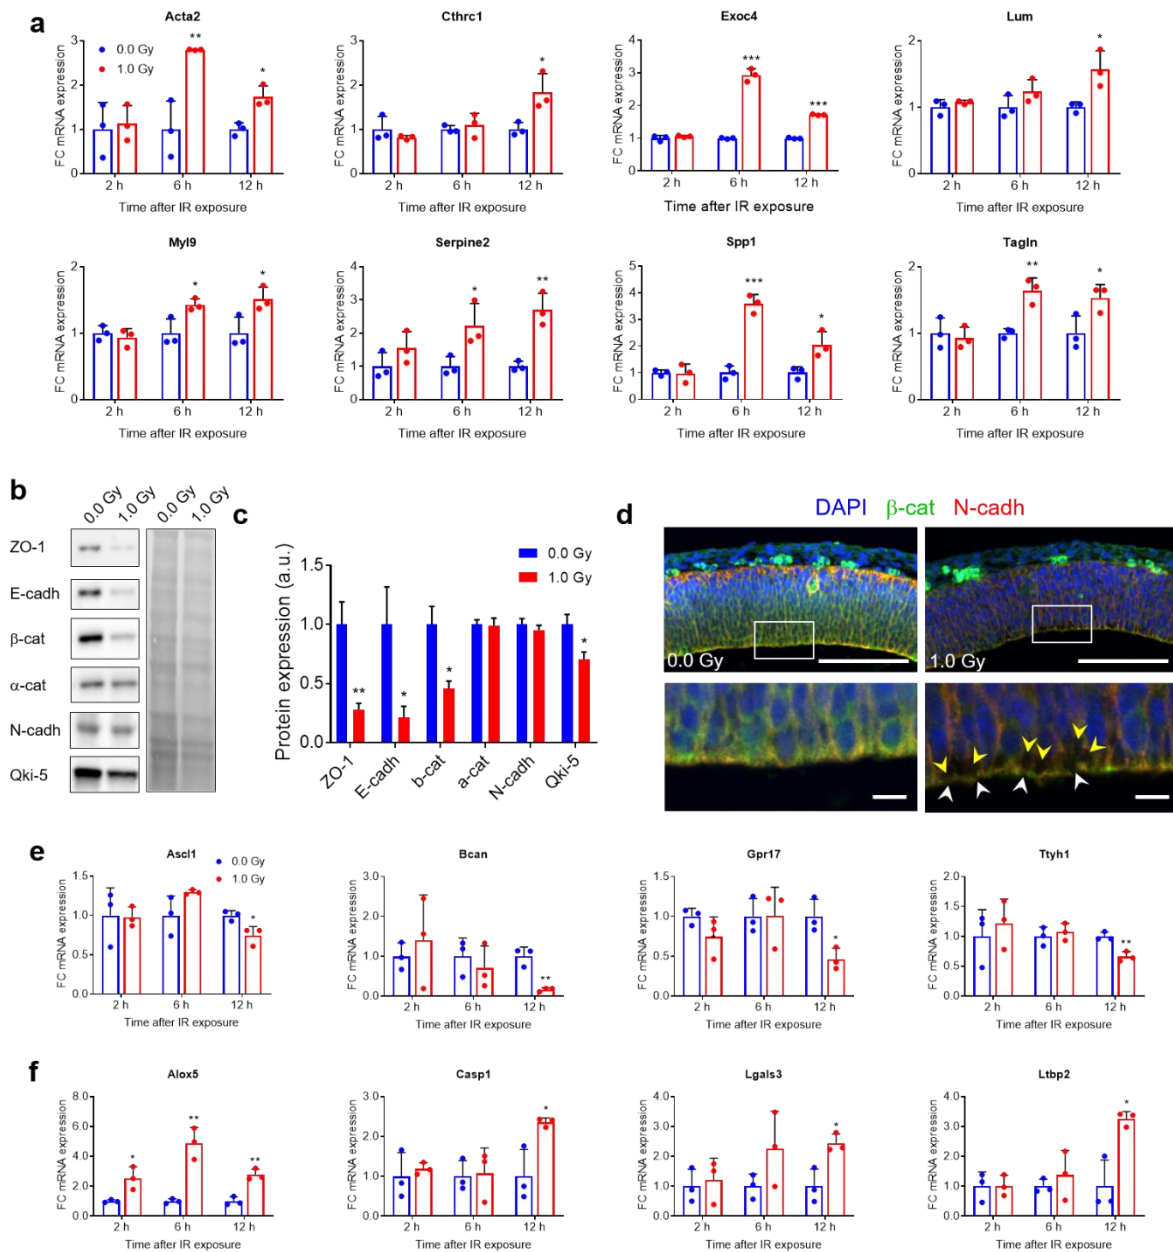

1029

1030

1031 **Supplemental figures**

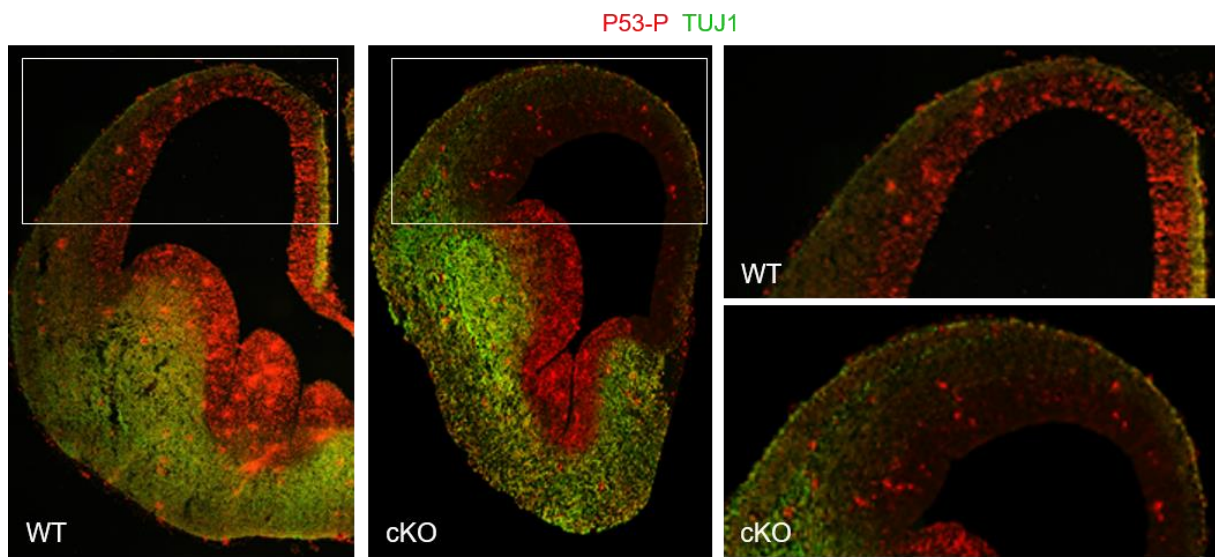

1032

1033

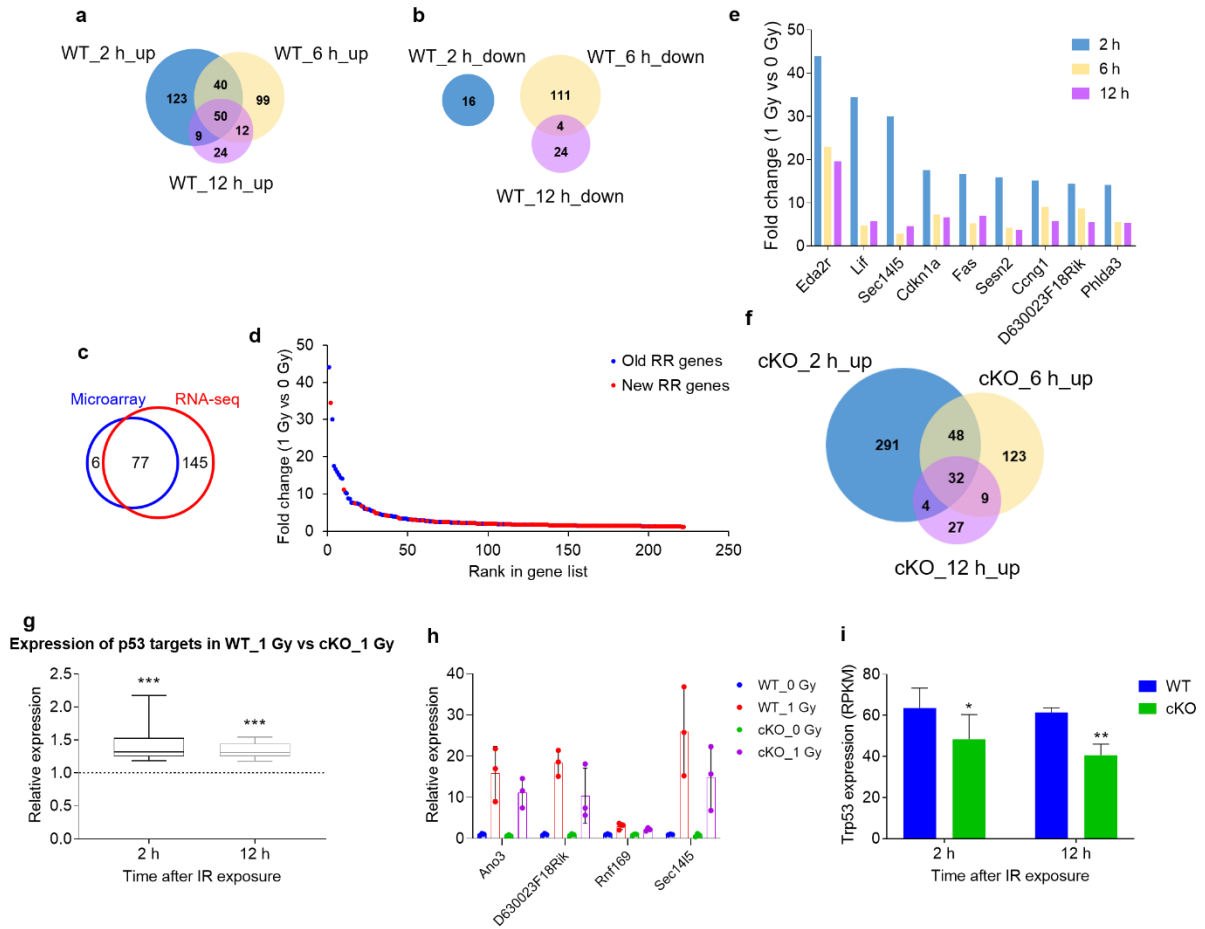

1034

1035

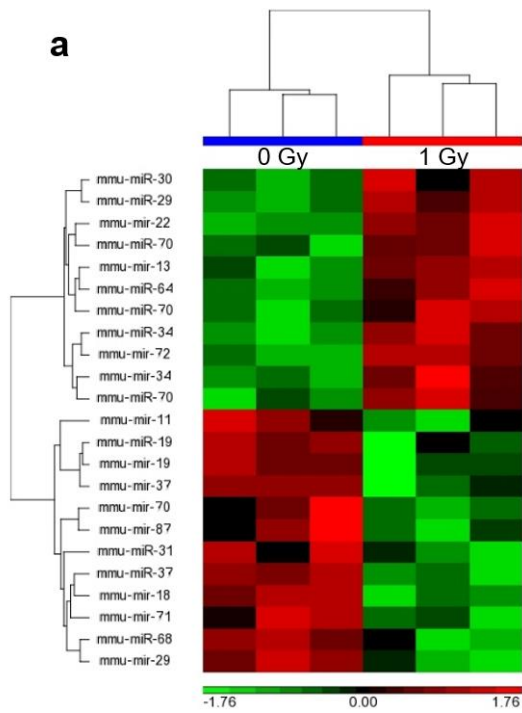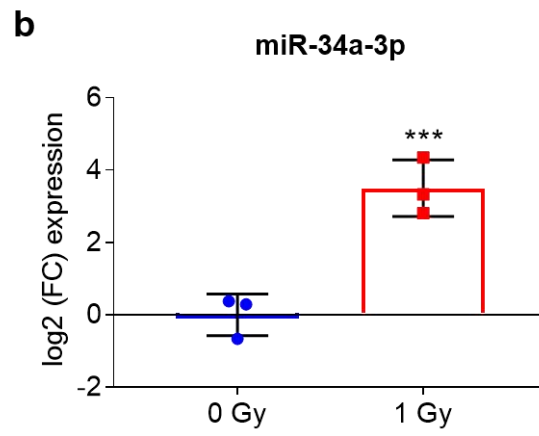

1036

1037

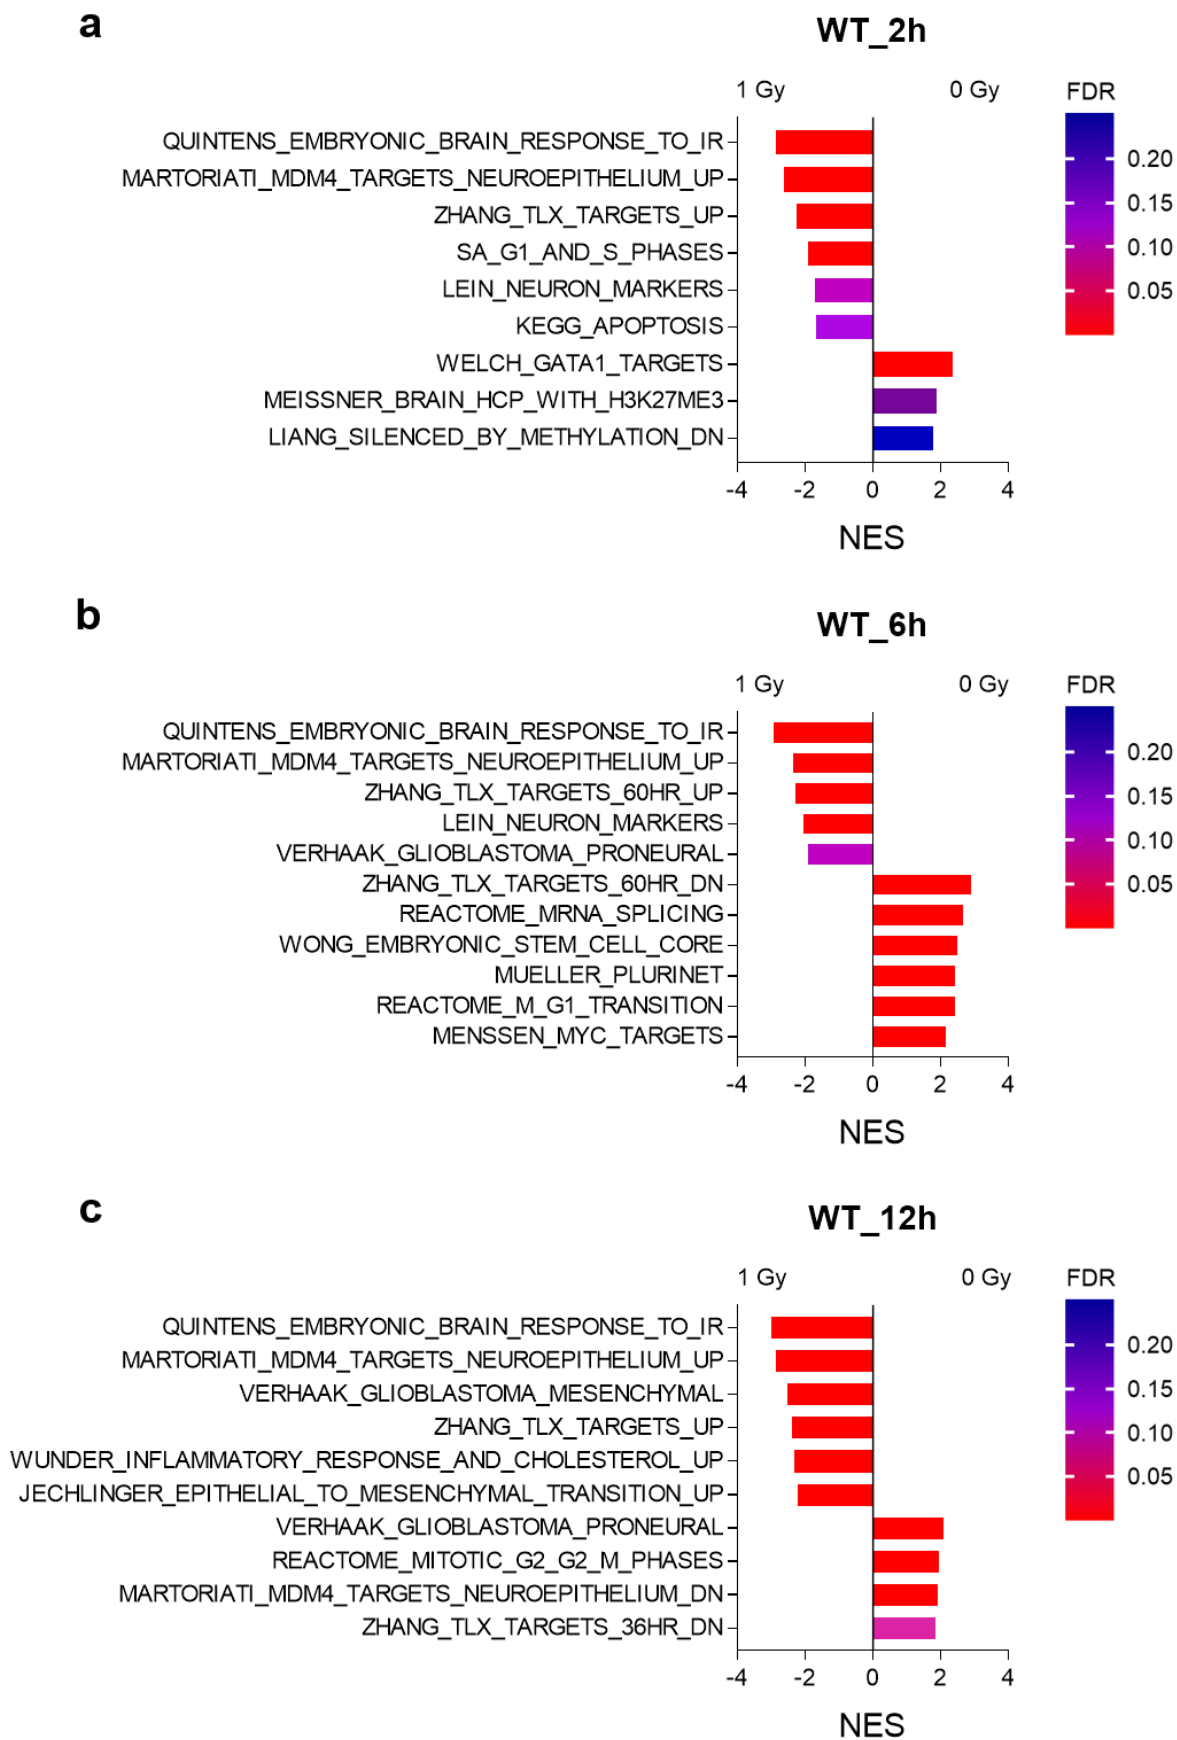

1039

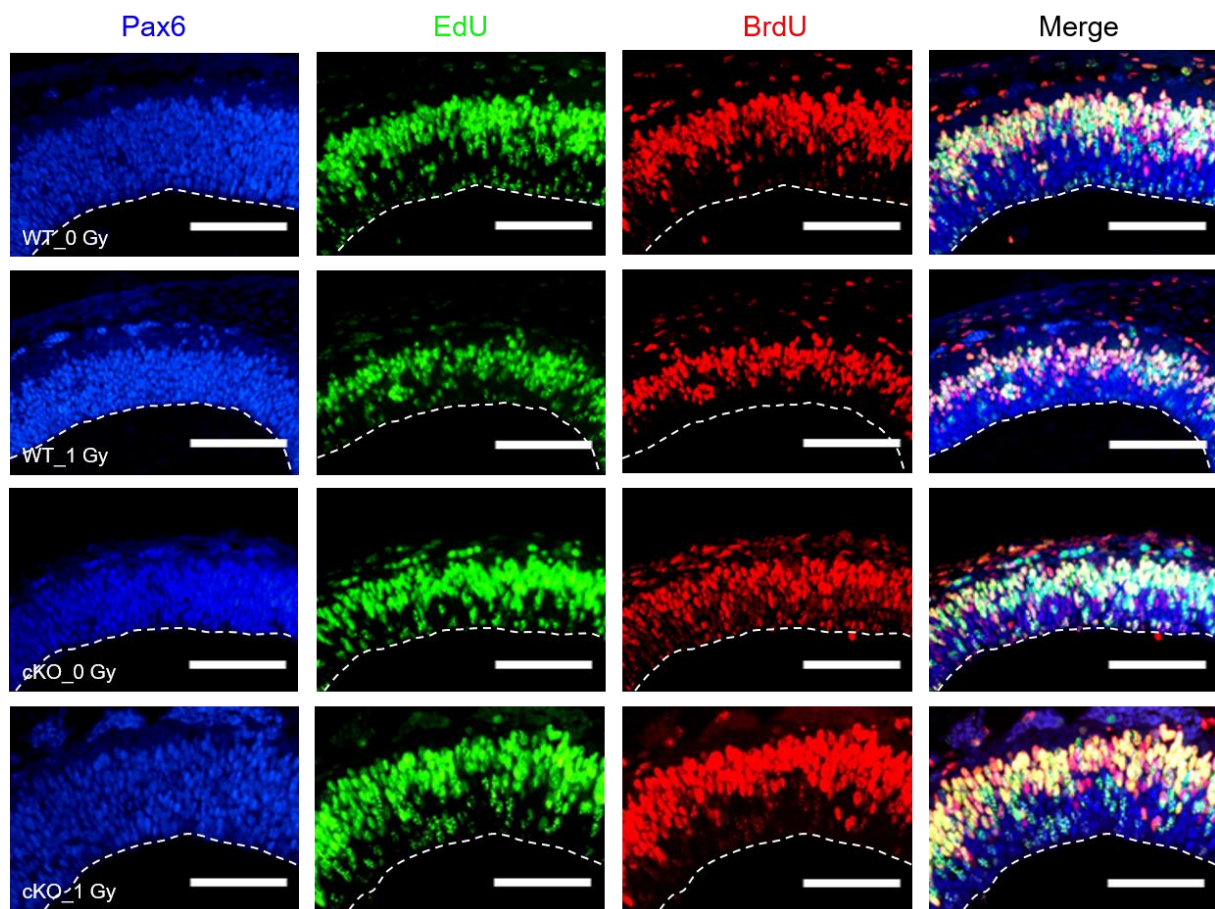

1040

1041



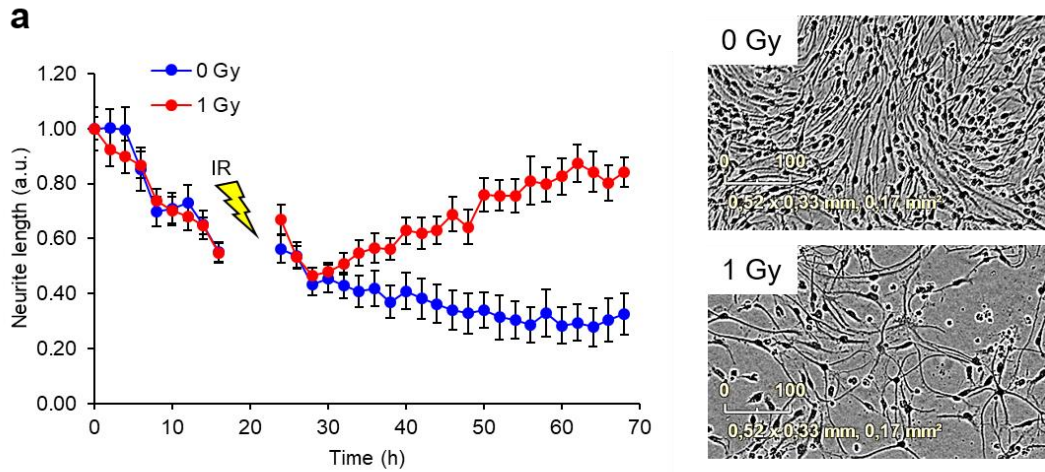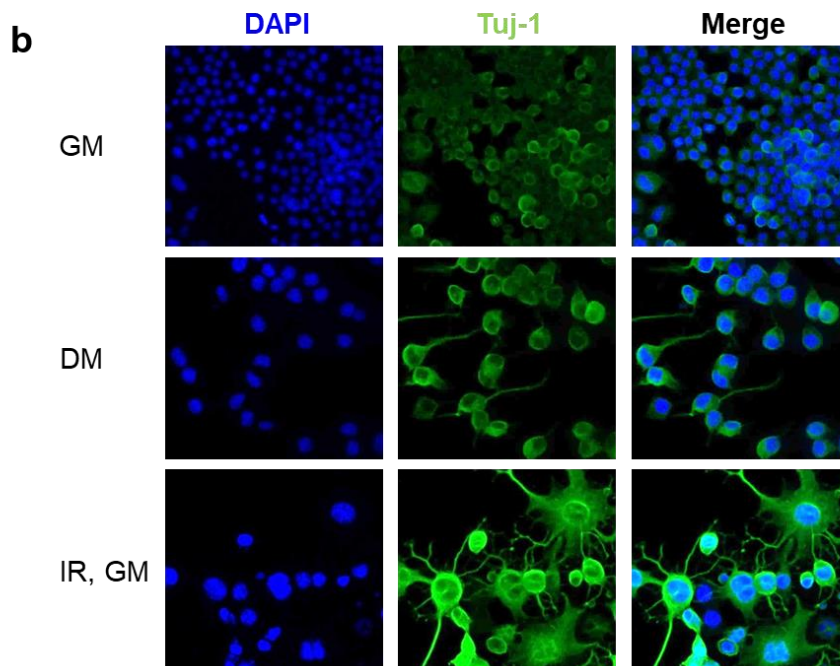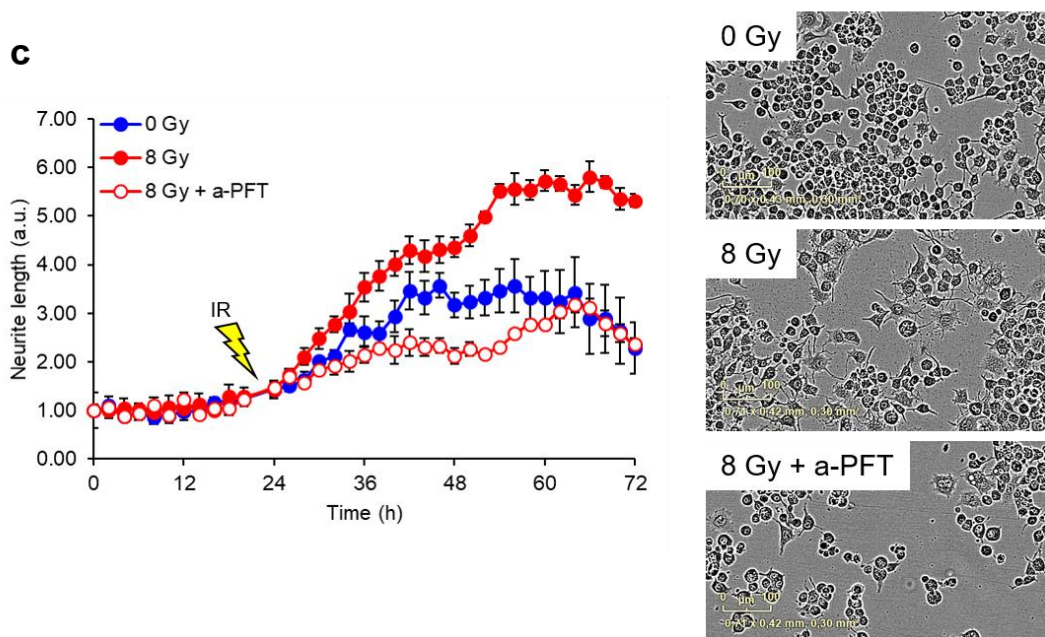

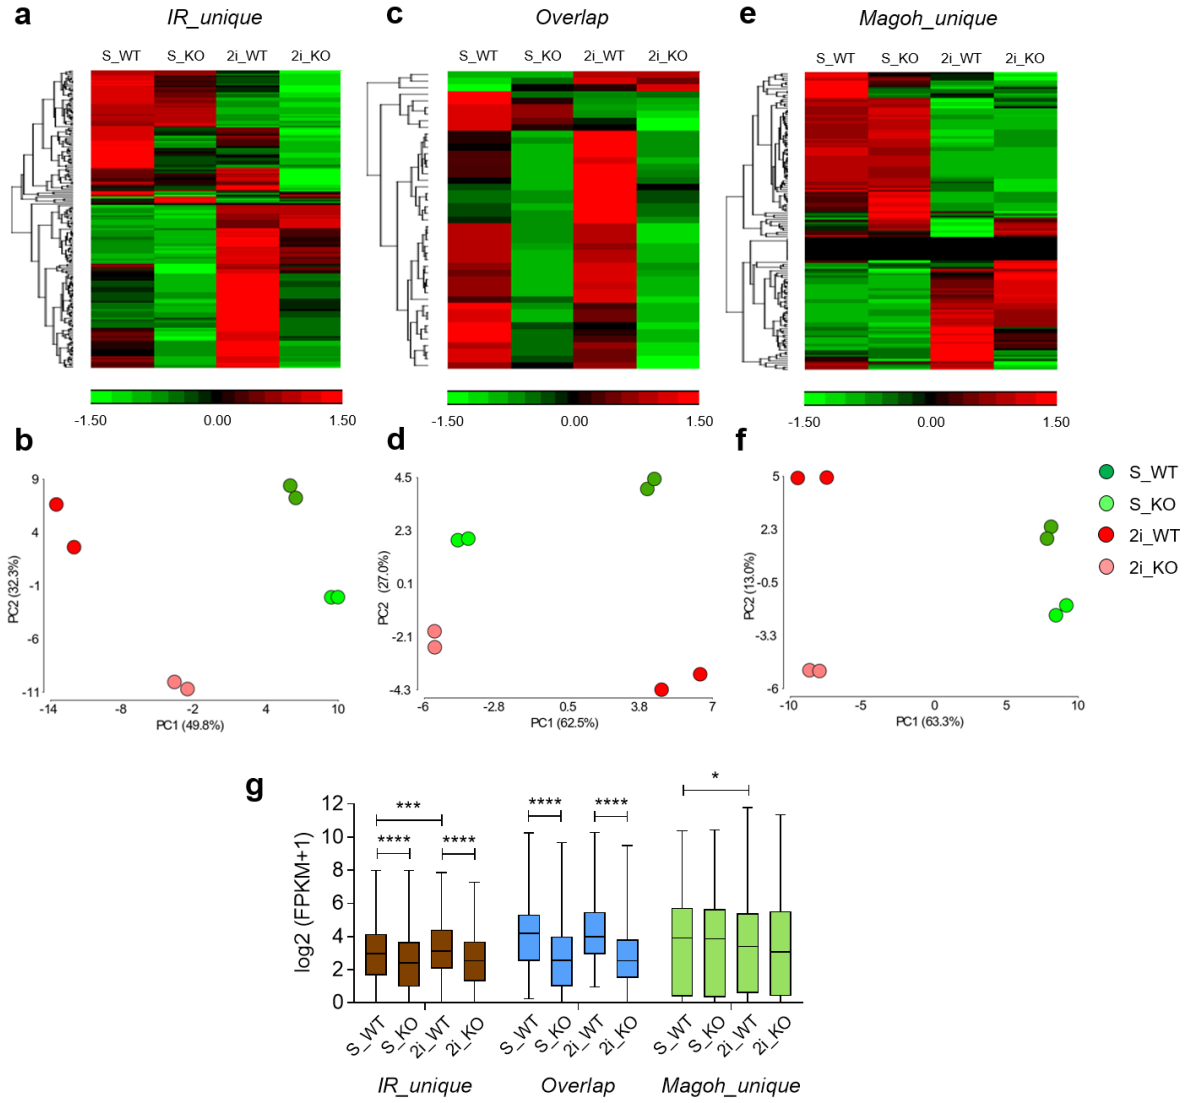

1043

1044

DAPI  $\beta$ -cat N-cad

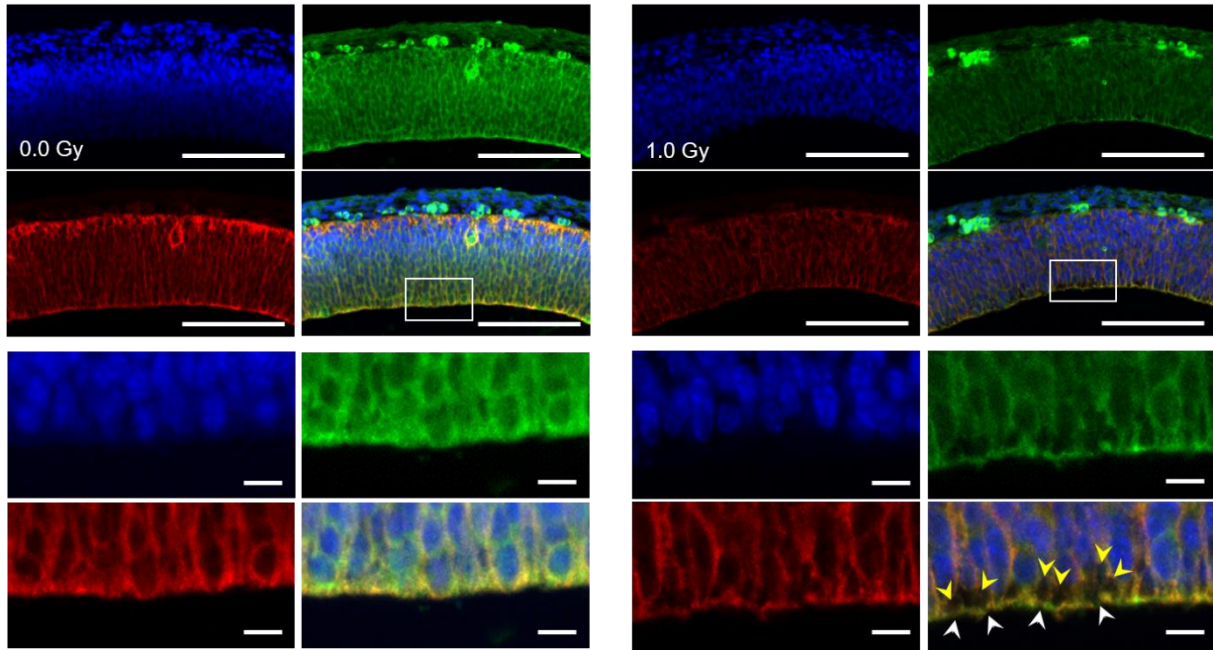

1045

1046

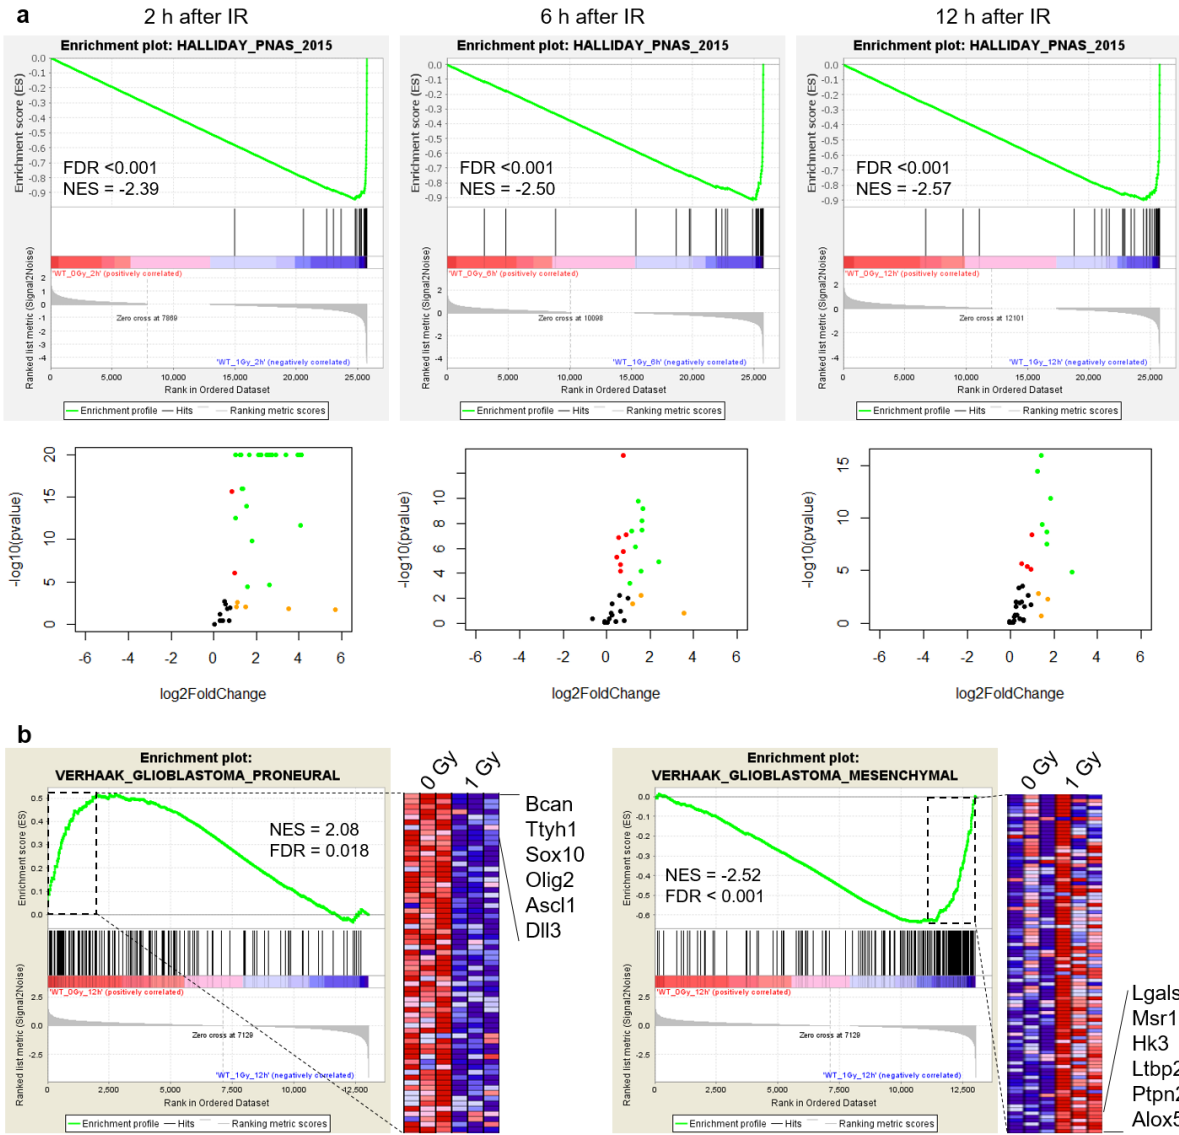

1047
